# Supplementary material for: Exploration of Photophysical and Nonlinear Properties of Salicylaldehyde-Based Functionalized Materials: A Facile Synthetic and DFT Approach
Source: PubMed Central journal article supplement — ACS Omega. 2021 Dec 3;6(49):33914–22. doi: 10.1021/acsomega.1c04984 (PMC8674987; doi:10.1021/acsomega.1c04984), 2021-12-03
Supplement: ao1c04984_si_001.pdf [file ao1c04984_si_001.pdf]

# Exploration of Photophysical and Nonlinear Properties of Salicylaldehyde Based Functionalized Materials: A Facile Synthetic and DFT Approach

Muhammad Imran<sup>1</sup>, Muhammad Khalid\*<sup>2</sup>, Rifat Jawaria<sup>2</sup>, Asif Ali<sup>2</sup>, Muhammad Adnan Asghar,<sup>3</sup> Zahid Shafiq<sup>4</sup>, Mohammed A. Assiri<sup>1</sup>, Hafiza Munazza Lodhi<sup>2</sup>, Ataulpa Albert Carmo Braga<sup>5</sup>

<sup>1</sup>Department of Chemistry, Faculty of Science, King Khalid University, P.O. Box 9004, Abha 61413, Saudi Arabia

<sup>2</sup>Department of Chemistry, Khwaja Fareed University of Engineering & Information Technology, Rahim Yar Khan, 64200, Pakistan

<sup>3</sup>Department of Chemistry, Division of Science and Technology, University of Education Lahore, Pakistan

<sup>4</sup>Institute of Chemical Sciences, Bahauddin Zakariya University, Multan, 60800, Pakistan

<sup>5</sup>Departamento de Química Fundamental, Instituto de Química, Universidade de São Paulo, Avenida Professor Lineu Prestes, 748, São Paulo 05508-000, Brazil

\*Corresponding authors E-mail addresses:

Dr. Muhammad Khalid: [khalid@iq.usp.br](mailto:khalid@iq.usp.br); [muhammad.khalid@kfueit.edu.pk](mailto:muhammad.khalid@kfueit.edu.pk)

## Supplementary Information

**Table S1.** Natural bond orbital (NBO) analysis of **Compound 1** by using M06/6-311G(d,p).

| Donor<br>(i) | Type     | Acceptor<br>(j) | Type       | E(2)<br>[kcal/mol] | E(j)-E(i)<br>[a.u.] | F(i,j)<br>[a.u.] |
|--------------|----------|-----------------|------------|--------------------|---------------------|------------------|
| C1-C6        | $\pi$    | C2-C3           | $\pi^*$    | 21.84              | 0.30                | 0.073            |
| C1-C6        | $\pi$    | C4-C5           | $\pi^*$    | 22.24              | 0.30                | 0.073            |
| C2-C3        | $\pi$    | C1-C6           | $\pi^*$    | 22.07              | 0.30                | 0.073            |
| C2-C3        | $\pi$    | C4-C5           | $\pi^*$    | 21.37              | 0.30                | 0.072            |
| C4-C5        | $\pi$    | C1-C6           | $\pi^*$    | 21.62              | 0.30                | 0.072            |
| C4-C5        | $\pi$    | C2-C3           | $\pi^*$    | 22.86              | 0.30                | 0.075            |
| N15-H16      | $\sigma$ | C17-S18         | $\pi^*$    | 5.12               | 0.92                | 0.062            |
| C17-S18      | $\sigma$ | C17-S18         | $\sigma^*$ | 7.61               | 0.35                | 0.051            |
| C17-S18      | $\pi$    | C17-S18         | $\pi^*$    | 0.57               | 0.90                | 0.020            |
| C17-C19      | $\sigma$ | N19-H20         | $\sigma^*$ | 0.52               | 1.21                | 0.023            |
| C22-H23      | $\sigma$ | N19-N21         | $\sigma^*$ | 9.09               | 0.92                | 0.082            |
| C24-C26      | $\sigma$ | C28-C135        | $\sigma^*$ | 5.14               | 0.87                | 0.060            |
| C24-C26      | $\pi$    | C25-C27         | $\pi^*$    | 23.48              | 0.29                | 0.075            |
| C24-C26      | $\pi$    | C28-C30         | $\pi^*$    | 19.56              | 0.29                | 0.069            |
| C25-C27      | $\sigma$ | C24-C25         | $\sigma^*$ | 5.49               | 1.29                | 0.075            |
| C25-C27      | $\pi$    | C24-C26         | $\pi^*$    | 18.78              | 0.31                | 0.068            |

|         |            |          |            |       |      |       |
|---------|------------|----------|------------|-------|------|-------|
| C25-C27 | $\pi$      | C28-C30  | $\pi^*$    | 26.43 | 0.30 | 0.080 |
| C27-C30 | $\sigma$   | C28-Cl35 | $\sigma^*$ | 5.49  | 0.87 | 0.062 |
| C28-C30 | $\pi$      | C24-C26  | $\pi^*$    | 23.95 | 0.31 | 0.078 |
| C28-C30 | $\pi$      | C25-C27  | $\pi^*$    | 17.42 | 0.31 | 0.066 |
| N15     | LP(1)      | C12-H14  | $\sigma^*$ | 7.80  | 0.66 | 0.069 |
| N15     | LP(1)      | C17-S18  | $\sigma^*$ | 51.48 | 0.29 | 0.112 |
| S18     | LP(2)      | N15-C17  | $\sigma^*$ | 12.93 | 0.64 | 0.083 |
| S18     | LP(2)      | C17-N19  | $\sigma^*$ | 15.37 | 0.60 | 0.087 |
| N19     | LP(1)      | C17-S18  | $\sigma^*$ | 36.13 | 0.30 | 0.095 |
| N19     | LP(1)      | N21-C22  | $\pi^*$    | 31.04 | 0.33 | 0.093 |
| N21     | LP(1)      | N19-H20  | $\sigma^*$ | 9.46  | 0.74 | 0.076 |
| N21     | LP(1)      | C22-H23  | $\sigma^*$ | 5.52  | 0.78 | 0.059 |
| N21     | LP(1)      | C22-C24  | $\sigma^*$ | 12.34 | 0.84 | 0.092 |
| O33     | LP(1)      | C25-C27  | $\sigma^*$ | 6.38  | 1.20 | 0.078 |
| O33     | LP(2)      | C25-C27  | $\pi^*$    | 31.77 | 0.37 | 0.103 |
| Cl35    | LP(3)      | C28-C30  | $\pi^*$    | 13.0  | 0.34 | 0.065 |
| Cl35    | LP(2)      | C24-C26  | $\sigma^*$ | 0.52  | 0.89 | 0.019 |
| C17-S18 | $\sigma^*$ | C17-S18  | $\pi^*$    | 17.89 | 0.25 | 0.121 |
| C24-C26 | $\pi^*$    | N21-C22  | $\pi^*$    | 52.48 | 0.02 | 0.056 |

**Table S2.** Natural bond orbital (NBO) analysis of **Compound 2** by using M06/6-311G(d,p).

| Donor<br>(i) | Type     | Acceptor<br>(j) | Type       | E(2)<br>[kcal/mol] | E(j)-E(i)<br>[a.u.] | F(i,j)<br>[a.u.] |
|--------------|----------|-----------------|------------|--------------------|---------------------|------------------|
| C1-C6        | $\pi$    | C2-C3           | $\pi^*$    | 24.17              | 0.30                | 0.076            |
| C1-C6        | $\pi$    | C4-C5           | $\pi^*$    | 20.94              | 0.29                | 0.070            |
| C2-C3        | $\pi$    | C1-C6           | $\pi^*$    | 20.05              | 0.30                | 0.070            |
| C2-C3        | $\pi$    | C4-C5           | $\pi^*$    | 24.94              | 0.29                | 0.077            |
| C3-C4        | $\sigma$ | C4-C5           | $\sigma^*$ | 5.33               | 1.30                | 0.074            |
| C3-C11       | $\sigma$ | C11-H13         | $\sigma^*$ | 0.54               | 1.04                | 0.021            |
| C4-C5        | $\sigma$ | C3-C4           | $\sigma^*$ | 5.61               | 1.30                | 0.077            |
| C4-C5        | $\pi$    | C1-C6           | $\pi^*$    | 22.91              | 0.31                | 0.076            |
| C4-C5        | $\pi$    | C2-C3           | $\pi^*$    | 20.85              | 0.31                | 0.072            |
| C4-C5        | $\pi$    | C4-C5           | $\pi$      | 0.51               | 0.30                | 0.011            |
| C16-S17      | $\sigma$ | C16-S17         | $\sigma^*$ | 6.93               | 0.32                | 0.047            |
| C21-H22      | $\sigma$ | N18-N20         | $\sigma^*$ | 9.09               | 0.92                | 0.082            |
| C23-C25      | $\sigma$ | C27-Cl34        | $\sigma^*$ | 5.13               | 0.87                | 0.060            |
| C23-C25      | $\pi$    | N20-C21         | $\pi^*$    | 10.07              | 0.32                | 0.053            |
| C23-C25      | $\pi$    | C24-C26         | $\pi^*$    | 23.52              | 0.29                | 0.075            |
| C23-C25      | $\pi$    | C27-C29         | $\pi^*$    | 19.58              | 0.29                | 0.069            |
| C24-C26      | $\sigma$ | C23-C24         | $\sigma^*$ | 5.49               | 1.29                | 0.075            |
| C24-C26      | $\pi$    | C23-C25         | $\pi^*$    | 18.73              | 0.31                | 0.068            |
| C24-C26      | $\pi$    | C27-C29         | $\pi^*$    | 26.37              | 0.30                | 0.080            |
| C26-C29      | $\sigma$ | C27-Cl34        | $\sigma^*$ | 5.47               | 0.87                | 0.062            |
| C27-C29      | $\pi$    | C23-C25         | $\pi^*$    | 23.93              | 0.31                | 0.078            |

|         |            |          |            |       |      |       |
|---------|------------|----------|------------|-------|------|-------|
| C27-C29 | $\pi$      | C24-C26  | $\pi^*$    | 17.45 | 0.31 | 0.066 |
| N14     | LP(1)      | C11-H13  | $\sigma^*$ | 7.26  | 0.66 | 0.066 |
| N14     | LP(1)      | C16-S17  | $\sigma^*$ | 57.49 | 0.27 | 0.115 |
| N14     | LP(1)      | C16-S17  | $\pi^*$    | 0.61  | 0.55 | 0.017 |
| S17     | LP(2)      | N14-C16  | $\sigma^*$ | 12.94 | 0.65 | 0.083 |
| S17     | LP(2)      | C16-N18  | $\sigma^*$ | 15.29 | 0.60 | 0.087 |
| N18     | LP(1)      | C16-S17  | $\sigma^*$ | 40.32 | 0.28 | 0.098 |
| N18     | LP(1)      | N20-C21  | $\pi^*$    | 31.14 | 0.33 | 0.093 |
| N20     | LP(1)      | N18-H19  | $\sigma^*$ | 9.49  | 0.74 | 0.076 |
| N20     | LP(1)      | C21-H22  | $\sigma^*$ | 5.52  | 0.78 | 0.059 |
| N20     | LP(1)      | C21-C23  | $\sigma^*$ | 12.35 | 0.84 | 0.092 |
| O32     | LP(1)      | C24-C26  | $\sigma^*$ | 6.37  | 1.20 | 0.078 |
| O32     | LP(2)      | C24 -C26 | $\pi^*$    | 31.69 | 0.37 | 0.103 |
| Cl34    | LP(3)      | C27-C29  | $\pi^*$    | 13.06 | 0.34 | 0.065 |
| F35     | LP(2)      | C3-C4    | $\pi^*$    | 6.32  | 1.01 | 0.071 |
| F35     | LP(2)      | C4-C5    | $\sigma^*$ | 6.23  | 1.01 | 0.071 |
| F35     | LP(3)      | C4-C5    | $\pi^*$    | 20.12 | 0.46 | 0.093 |
| C16-S17 | $\sigma^*$ | C16-S17  | $\pi^*$    | 11.72 | 0.28 | 0.104 |
| C23-C25 | $\pi^*$    | N20-C21  | $\pi^*$    | 53.91 | 0.02 | 0.056 |

**Table S3.** Natural bond orbital (NBO) analysis of **Compound 3** by using M06/6-311G(d,p).

| Donor<br>(i) | Type     | Acceptor<br>(j) | Type       | E(2)<br>[kcal/mol] | E(j)-E(i)<br>[a.u.] | F(i,j)<br>[a.u.] |
|--------------|----------|-----------------|------------|--------------------|---------------------|------------------|
| C1-C6        | $\pi$    | C2-C3           | $\pi^*$    | 22.84              | 0.32                | 0.076            |
| C1-C6        | $\pi$    | C4-C5           | $\pi^*$    | 20.30              | 0.31                | 0.071            |
| C2-C3        | $\pi$    | C1-C6           | $\pi^*$    | 20.56              | 0.29                | 0.070            |
| C2-C3        | $\pi$    | C4-C5           | $\pi^*$    | 23.61              | 0.30                | 0.075            |
| C4-C5        | $\pi$    | C1-C6           | $\pi^*$    | 24.58              | 0.29                | 0.077            |
| C4-C5        | $\pi$    | C2-C3           | $\pi^*$    | 20.41              | 0.31                | 0.071            |
| N12-H13      | $\sigma$ | C14-S15         | $\pi^*$    | 5.13               | 0.91                | 0.062            |
| C14-S15      | $\sigma$ | C14-S15         | $\sigma^*$ | 7.77               | 0.37                | 0.053            |
| C14-S15      | $\pi$    | C14-S15         | $\pi^*$    | 0.75               | 0.89                | 0.023            |
| C19-H20      | $\sigma$ | N16-N18         | $\sigma^*$ | 9.06               | 0.92                | 0.082            |
| C21-C23      | $\sigma$ | C25-Cl32        | $\sigma^*$ | 5.14               | 0.87                | 0.060            |
| C21-C23      | $\pi$    | N18-C19         | $\pi^*$    | 10.00              | 0.32                | 0.052            |
| C21-C23      | $\pi$    | C22-C24         | $\pi^*$    | 23.43              | 0.30                | 0.075            |
| C21-C23      | $\pi$    | C25-C27         | $\pi^*$    | 19.54              | 0.29                | 0.069            |
| C22-C24      | $\sigma$ | C 21-C 22       | $\sigma^*$ | 5.49               | 1.29                | 0.075            |
| C22-C24      | $\pi$    | C 21-C23        | $\pi^*$    | 18.80              | 0.31                | 0.068            |
| C22-C24      | $\pi$    | C25-C27         | $\pi^*$    | 26.47              | 0.30                | 0.080            |
| C24-C27      | $\sigma$ | C25-Cl32        | $\sigma^*$ | 5.47               | 0.87                | 0.062            |
| C25-C27      | $\pi$    | C21-C23         | $\pi^*$    | 23.99              | 0.31                | 0.078            |
| C25-C27      | $\pi$    | C22-C24         | $\pi^*$    | 17.44              | 0.31                | 0.066            |
| C27-H29      | $\sigma$ | C24-H28         | $\sigma^*$ | 0.80               | 0.93                | 0.024            |
| N12          | LP(1)    | C3-C9           | $\sigma^*$ | 0.65               | 0.73                | 0.021            |

|         |            |          |            |        |      |       |
|---------|------------|----------|------------|--------|------|-------|
| N12     | LP(1)      | C9-H11   | $\sigma^*$ | 7.85   | 0.66 | 0.069 |
| N12     | LP(1)      | C14-S15  | $\sigma^*$ | 48.81  | 0.30 | 0.111 |
| S15     | LP(2)      | N 12-C14 | $\sigma^*$ | 13.01  | 0.64 | 0.083 |
| S15     | LP(2)      | C14-N16  | $\sigma^*$ | 15.37  | 0.61 | 0.088 |
| N16     | LP(1)      | C14-S15  | $\sigma^*$ | 34.19  | 0.31 | 0.093 |
| N16     | LP(1)      | N18-C19  | $\pi^*$    | 30.86  | 0.33 | 0.093 |
| N18     | LP(1)      | N16-H17  | $\sigma^*$ | 9.45   | 0.74 | 0.076 |
| N18     | LP(1)      | C19-H20  | $\sigma^*$ | 5.50   | 0.78 | 0.059 |
| N18     | LP(1)      | C19-C21  | $\sigma^*$ | 12.32  | 0.85 | 0.092 |
| O30     | LP(1)      | C 22-C24 | $\sigma^*$ | 6.39   | 1.20 | 0.078 |
| O30     | LP(2)      | C22-C24  | $\pi^*$    | 31.80  | 0.37 | 0.103 |
| Cl32    | LP(3)      | C25-C27  | $\pi^*$    | 13.00  | 0.34 | 0.065 |
| F35     | LP(2)      | C1-C6    | $\sigma^*$ | 6.38   | 1.01 | 0.072 |
| F35     | LP(2)      | C5-C6    | $\sigma^*$ | 6.41   | 1.01 | 0.072 |
| F35     | LP(3)      | C1-C6    | $\pi^*$    | 20.25  | 0.46 | 0.093 |
| C1-C6   | $\pi^*$    | C2-C3    | $\pi^*$    | 281.67 | 0.01 | 0.084 |
| C14-S15 | $\sigma^*$ | C14-S15  | $\pi^*$    | 21.21  | 0.23 | 0.128 |
| C21-C23 | $\pi^*$    | N18-C19  | $\pi^*$    | 53.40  | 0.02 | 0.056 |

**Table S4.** Natural bond orbital (NBO) analysis of **Compound 4** by using M06/6-311G(d,p).

| Donor<br>(i) | Type     | Acceptor<br>(j) | Type       | E(2)<br>[kcal/mol] | E(j)-E(i)<br>[a.u.] | F(i,j)<br>[a.u.] |
|--------------|----------|-----------------|------------|--------------------|---------------------|------------------|
| C1-C2        | $\pi$    | C3-C4           | $\pi^*$    | 21.80              | 0.31                | 0.073            |
| C1-C2        | $\pi$    | C5-C6           | $\pi^*$    | 22.80              | 0.30                | 0.074            |
| C2-C3        | $\sigma$ | C3-C4           | $\sigma^*$ | 5.27               | 1.30                | 0.074            |
| C2-H7        | $\sigma$ | C3-C4           | $\sigma^*$ | 5.08               | 1.11                | 0.067            |
| C3-C4        | $\pi$    | C1-C2           | $\pi^*$    | 23.80              | 0.29                | 0.075            |
| C3-C4        | $\pi$    | C5-C6           | $\pi^*$    | 21.54              | 0.29                | 0.072            |
| C5-C6        | $\pi$    | C1-C2           | $\pi^*$    | 22.05              | 0.30                | 0.072            |
| C5-C6        | $\pi$    | C3-C4           | $\pi^*$    | 23.44              | 0.30                | 0.076            |
| N19-C20      | $\pi$    | N19-C20         | $\pi^*$    | 1.01               | 0.39                | 0.018            |
| C20-H21      | $\sigma$ | N1-N19          | $\sigma^*$ | 8.85               | 0.92                | 0.081            |
| C20-C22      | $\sigma$ | C20-H21         | $\sigma^*$ | 0.58               | 1.08                | 0.022            |
| C22-C24      | $\sigma$ | C26-Cl33        | $\sigma^*$ | 5.19               | 0.87                | 0.060            |
| C22-C24      | $\pi$    | N19-C20         | $\pi^*$    | 9.53               | 0.32                | 0.051            |
| C23-C25      | $\sigma$ | C22-C23         | $\sigma^*$ | 5.54               | 1.29                | 0.076            |
| C25-C28      | $\sigma$ | C26-Cl33        | $\sigma^*$ | 5.46               | 0.87                | 0.062            |
| N13          | LP(1)    | C10-H12         | $\sigma^*$ | 7.59               | 0.66                | 0.068            |
| N13          | LP(1)    | C15-S16         | $\sigma^*$ | 69.80              | 0.23                | 0.118            |
| S16          | LP(2)    | C3-C10          | $\sigma^*$ | 0.53               | 0.63                | 0.017            |
| S16          | LP(2)    | N 3-C15         | $\sigma^*$ | 12.56              | 0.65                | 0.082            |
| S16          | LP(2)    | C15-N17         | $\sigma^*$ | 14.97              | 0.61                | 0.087            |
| N17          | LP(1)    | C15-S16         | $\sigma^*$ | 56.61              | 0.25                | 0.110            |
| N17          | LP(1)    | N19-C20         | $\pi^*$    | 29.39              | 0.33                | 0.091            |
| N19          | LP(1)    | N17-H18         | $\sigma^*$ | 9.12               | 0.74                | 0.074            |
| N19          | LP(1)    | C20-H21         | $\sigma^*$ | 5.30               | 0.78                | 0.058            |

|         |         |          |            |       |      |       |
|---------|---------|----------|------------|-------|------|-------|
| N19     | LP(1)   | C 20-C22 | $\sigma^*$ | 12.04 | 0.85 | 0.091 |
| C23     | LP(1)   | C22-C24  | $\pi^*$    | 64.69 | 0.15 | 0.109 |
| C23     | LP(1)   | C25-C28  | $\pi^*$    | 65.08 | 0.15 | 0.110 |
| C26     | LP(1)   | C22-C24  | $\pi^*$    | 70.47 | 0.17 | 0.115 |
| C26     | LP(1)   | C 25-C28 | $\pi^*$    | 69.66 | 0.17 | 0.115 |
| O31     | LP(1)   | C23-C25  | $\sigma^*$ | 6.43  | 1.19 | 0.078 |
| C22-C24 | $\pi^*$ | N19-C20  | $\pi^*$    | 47.60 | 0.02 | 0.054 |

**Table S5.** Natural bond orbital (NBO) analysis of **Compound 5** by using M06/6-311G(d,p).

| Donor<br>(i) | Type       | Acceptor<br>(j) | Type       | E(2)<br>[kcal/mol] | E(j)-E(i)<br>[a.u.] | F(i,j)<br>[a.u.] |
|--------------|------------|-----------------|------------|--------------------|---------------------|------------------|
| C1-C2        | $\pi$      | C3-C4           | $\pi^*$    | 24.60              | 0.30                | 0.077            |
| C1-C2        | $\pi$      | C5-C6           | $\pi^*$    | 21.07              | 0.30                | 0.071            |
| C1-H34       | $\sigma$   | C1-C2           | $\sigma^*$ | 0.69               | 1.11                | 0.025            |
| C3-C4        | $\pi$      | C1-C2           | $\pi^*$    | 21.44              | 0.30                | 0.071            |
| C3-C4        | $\pi$      | C5-C6           | $\pi^*$    | 24.29              | 0.30                | 0.077            |
| C5-C6        | $\pi$      | C1-C2           | $\pi^*$    | 24.70              | 0.29                | 0.076            |
| C5-C6        | $\pi$      | C3-C4           | $\pi^*$    | 21.95              | 0.29                | 0.072            |
| N12-H13      | $\sigma$   | C14-S15         | $\pi^*$    | 5.11               | 0.93                | 0.063            |
| N18-C19      | $\pi$      | N18-C19         | $\pi^*$    | 1.12               | 0.39                | 0.019            |
| C14-S15      | $\sigma$   | C14-S15         | $\sigma^*$ | 7.39               | 0.34                | 0.049            |
| C21-C23      | $\sigma$   | C25-C132        | $\sigma^*$ | 5.16               | 0.87                | 0.060            |
| C21-C23      | $\pi$      | N18-C19         | $\pi^*$    | 9.75               | 0.32                | 0.052            |
| C21-C23      | $\pi$      | C22-C24         | $\pi^*$    | 23.47              | 0.29                | 0.075            |
| C21-C23      | $\pi$      | C25-C27         | $\pi^*$    | 19.61              | 0.29                | 0.069            |
| C22-C24      | $\sigma$   | C21-C22         | $\sigma^*$ | 5.50               | 1.29                | 0.075            |
| C22-C24      | $\pi$      | C21-C23         | $\pi^*$    | 18.83              | 0.31                | 0.068            |
| C22-C24      | $\pi$      | C25-C27         | $\pi^*$    | 26.43              | 0.30                | 0.080            |
| C24-C27      | $\sigma$   | C25-C132        | $\sigma^*$ | 5.50               | 0.87                | 0.062            |
| C25-C27      | $\pi$      | C21-C23         | $\pi^*$    | 23.93              | 0.31                | 0.078            |
| C25-C27      | $\pi$      | C22-C24         | $\pi^*$    | 17.40              | 0.31                | 0.066            |
| N12          | LP(1)      | C9-H11          | $\sigma^*$ | 7.87               | 0.66                | 0.069            |
| N12          | LP(1)      | C14-S15         | $\sigma^*$ | 54.13              | 0.28                | 0.114            |
| S15          | LP(1)      | C14-S15         | $\sigma^*$ | 0.79               | 0.69                | 0.023            |
| S15          | LP(2)      | N12-C14         | $\sigma^*$ | 12.89              | 0.64                | 0.083            |
| S15          | LP(2)      | C14-N16         | $\sigma^*$ | 15.35              | 0.60                | 0.087            |
| N16          | LP(1)      | C14-S15         | $\sigma^*$ | 38.20              | 0.29                | 0.096            |
| N16          | LP(1)      | N18-C19         | $\pi^*$    | 31.23              | 0.33                | 0.093            |
| N18          | LP(1)      | N16-H17         | $\sigma^*$ | 9.49               | 0.74                | 0.076            |
| N18          | LP(1)      | C19-H20         | $\sigma^*$ | 5.48               | 0.78                | 0.059            |
| N18          | LP(1)      | C19-C21         | $\sigma^*$ | 12.29              | 0.84                | 0.092            |
| O30          | LP(1)      | C22-C24         | $\sigma^*$ | 6.39               | 1.19                | 0.078            |
| O30          | LP(2)      | C22-C24         | $\pi^*$    | 31.80              | 0.37                | 0.103            |
| C132         | LP(2)      | C21-C23         | $\sigma^*$ | 0.52               | 0.89                | 0.019            |
| C132         | LP(3)      | C25-C27         | $\pi^*$    | 12.94              | 0.34                | 0.065            |
| C14-S15      | $\sigma^*$ | C14-S15         | $\pi^*$    | 15.0               | 0.26                | 0.114            |

|         |         |         |         |       |      |       |
|---------|---------|---------|---------|-------|------|-------|
| C21-C23 | $\pi^*$ | N18-C19 | $\pi^*$ | 50.46 | 0.02 | 0.056 |
|---------|---------|---------|---------|-------|------|-------|

**Table S6.** Natural bond orbital (NBO) analysis of **Compound 6** by using M06/6-311G(d,p).

| Donor<br>(i) | Type       | Acceptor<br>(j) | Type       | E(2)<br>[kcal/mol] | E(j)-E(i)<br>[a.u.] | F(i,j)<br>[a.u.] |
|--------------|------------|-----------------|------------|--------------------|---------------------|------------------|
| C1-C6        | $\pi$      | C2-C3           | $\pi^*$    | 23.51              | 0.30                | 0.075            |
| C1-C6        | $\pi$      | C4-C5           | $\pi^*$    | 21.01              | 0.30                | 0.071            |
| C1-H7        | $\sigma$   | C2-H8           | $\sigma^*$ | 0.76               | 0.93                | 0.024            |
| C2-C3        | $\pi$      | C1-C6           | $\pi^*$    | 20.46              | 0.31                | 0.071            |
| C2-C3        | $\pi$      | C4-C5           | $\pi^*$    | 21.87              | 0.30                | 0.073            |
| C4-C5        | $\pi$      | C1-C6           | $\pi^*$    | 22.45              | 0.31                | 0.075            |
| C4-C5        | $\pi$      | C2-C3           | $\pi^*$    | 21.58              | 0.30                | 0.073            |
| N14-H15      | $\sigma$   | C16-S17         | $\pi^*$    | 5.10               | 0.93                | 0.062            |
| N20-C21      | $\pi$      | N20-C21         | $\pi^*$    | 1.13               | 0.39                | 0.019            |
| C16-S17      | $\sigma$   | C16-S17         | $\sigma^*$ | 7.36               | 0.33                | 0.049            |
| C21-H22      | $\sigma$   | N18-N20         | $\sigma^*$ | 9.08               | 0.92                | 0.082            |
| C23-C25      | $\sigma$   | C27-C134        | $\sigma^*$ | 5.14               | 0.87                | 0.060            |
| C23-C25      | $\pi$      | N 20-C21        | $\pi^*$    | 10.02              | 0.32                | 0.053            |
| C23-C25      | $\pi$      | C24-C26         | $\pi^*$    | 23.41              | 0.29                | 0.075            |
| C23-C25      | $\pi$      | C27-C29         | $\pi^*$    | 19.62              | 0.29                | 0.069            |
| C24-C26      | $\sigma$   | C23-C24         | $\sigma^*$ | 5.48               | 1.29                | 0.075            |
| C24-C26      | $\pi$      | C23-C25         | $\pi^*$    | 18.77              | 0.31                | 0.068            |
| C24-C26      | $\pi$      | C27-C29         | $\pi^*$    | 26.42              | 0.30                | 0.080            |
| C26-C29      | $\sigma$   | C27-C134        | $\sigma^*$ | 5.48               | 0.87                | 0.062            |
| C27-C29      | $\pi$      | C23-C25         | $\pi^*$    | 23.87              | 0.31                | 0.078            |
| C27-C29      | $\pi$      | C24-C26         | $\pi^*$    | 17.43              | 0.31                | 0.066            |
| N14          | LP(1)      | C3-C11          | $\sigma^*$ | 0.52               | 0.73                | 0.019            |
| N14          | LP(1)      | C11-H13         | $\sigma^*$ | 7.69               | 0.66                | 0.068            |
| N14          | LP(1)      | C16-S17         | $\sigma^*$ | 54.80              | 0.28                | 0.114            |
| S17          | LP(2)      | N14-C16         | $\sigma^*$ | 12.88              | 0.65                | 0.083            |
| S17          | LP(2)      | C16-N18         | $\sigma^*$ | 15.42              | 0.60                | 0.087            |
| N18          | LP(1)      | C16-S17         | $\sigma^*$ | 39.43              | 0.29                | 0.098            |
| N18          | LP(1)      | N20-C21         | $\pi^*$    | 31.36              | 0.33                | 0.094            |
| N20          | LP(1)      | N18-H19         | $\sigma^*$ | 9.50               | 0.74                | 0.076            |
| N20          | LP(1)      | C21-H22         | $\sigma^*$ | 5.55               | 0.78                | 0.059            |
| N20          | LP(1)      | C21-C23         | $\sigma^*$ | 12.40              | 0.84                | 0.092            |
| O32          | LP(1)      | C24-C26         | $\sigma^*$ | 6.38               | 1.20                | 0.078            |
| O32          | LP(2)      | C24-26          | $\pi^*$    | 31.80              | 0.37                | 0.103            |
| Cl34         | LP(3)      | C27-C29         | $\pi^*$    | 12.98              | 0.34                | 0.065            |
| C16-S17      | $\sigma^*$ | C16- S17        | $\pi^*$    | 14.41              | 0.27                | 0.112            |
| C23-C25      | $\pi^*$    | N20-C21         | $\pi^*$    | 53.22              | 0.02                | 0.057            |

E(2) means energy of hyper conjugative interaction (stabilization energy in kcal/mol); Energy difference between donor & acceptor  $i$  &  $j$  NBO orbitals.; F( $i,j$ ) is the Fock matrix element between  $i$  &  $j$  NBO orbitals.

**Table S7.** Computed transition energy ( $eV$ ), maximum absorption wavelengths ( $\lambda_{max}/nm$ ), oscillator strengths ( $f$ ), and transition studies compounds.

| Comp     | EXP<br>$\lambda(nm)$ | DFT<br>$\lambda(nm)$ | $E$<br>( $eV$ ) | $f$                                                                                                     | MO transitions                                                                                              |
|----------|----------------------|----------------------|-----------------|---------------------------------------------------------------------------------------------------------|-------------------------------------------------------------------------------------------------------------|
| <b>1</b> | 241                  | 390                  | 3.1803          | 0.001                                                                                                   | H→L (86%) H→L+1 (3%), H→L+4 (9%)                                                                            |
|          |                      | 322                  | 3.8499          | 0.2131                                                                                                  | H-1→L (95%) H-2→L (3%)                                                                                      |
|          |                      | 309                  | 4.0101          | 0.0013                                                                                                  | H→L (13%), H→L+1 (38%), H→L+4 (33%)<br>H→L+2 (6%), H→L+3 (3%), H→L+7 (2%),<br>H→L+8 (2%)                    |
|          |                      | 286                  | 4.3299          | 0.0846                                                                                                  | H-2→L (78%) H-7→L+1 (2%), H-3→L (6%), H-<br>2→L+1 (2%), H-1→L (3%), H-1→L+1 (4%)                            |
|          |                      | 278                  | 4.4598          | 0.0145                                                                                                  | H→L+1 (51%), H→L+2 (25%), H→L+4 (16%)<br>H→L+7 (2%)                                                         |
|          |                      | 272                  | 4.5583          | 0.0819                                                                                                  | H-3→L (64%), H-2→L (10%) H-6→L (4%), H-4→L<br>(5%), H-2→L+1 (3%), H-1→L+1 (7%)                              |
| <b>2</b> | 240                  | 388                  | 3.1962          | 0.0005                                                                                                  | H→L (86%) H→L+1 (2%), H→L+4 (8%)                                                                            |
|          |                      | 323                  | 3.8421          | 0.2103                                                                                                  | H-1→L (94%) H-2→L (3%)                                                                                      |
|          |                      | 307                  | 4.0376          | 0.0009                                                                                                  | H→L (12%), H→L+1 (27%), H→L+2 (13%),<br>H→L+4 (31%) H→L+3 (8%), H→L+5 (2%),<br>H→L+9 (4%)                   |
|          |                      | 287                  | 4.3177          | 0.029                                                                                                   | H-2→L (20%), H→L+1 (37%), H→L+2 (34%)                                                                       |
|          |                      | 286                  | 4.3287          | 0.093                                                                                                   | H-2→L (60%), H→L+1 (10%), H→L+2 (14%) H-<br>3→L (4%), H-1→LUMO (3%)                                         |
|          |                      | 277                  | 4.4831          | 0.0025                                                                                                  | H→L+1 (19%), H→L+2 (34%), H→L+3 (22%),<br>H→L+4 (16%) H→L+7 (2%)                                            |
| <b>3</b> | 220                  | 388                  | 3.19230         | 0.001                                                                                                   | H→L (85%), H→L+4 (10%) H→L+1 (4%)                                                                           |
|          |                      | 321                  | 3.86280         | 0.2259                                                                                                  | H-1→L (94%) H-2→L (3%)                                                                                      |
|          |                      | 309                  | 4.01490         | 0.002                                                                                                   | H→L (13%), H→L+1 (44%), H→L+4 (34%)<br>H→L+8 (2%)                                                           |
|          |                      | 286                  | 4.3368          | 0.073                                                                                                   | H-2→L (77%) H-3→L (7%), H-1→L (3%), H-<br>1→L+1 (4%)                                                        |
|          |                      | 281                  | 4.4185          | 0.0033                                                                                                  | H→L+2 (96%)                                                                                                 |
|          | 275                  | 4.5094               | 0.006           | H→L+1 (51%), H→L+4 (40%) H→L+7 (3%)                                                                     |                                                                                                             |
| <b>4</b> | 219                  | 389                  | 3.1864          | 0.0013                                                                                                  | H→L (86%) H→L+1 (5%), H→L+3 (2%), H→L+4<br>(4%)                                                             |
|          |                      | 325                  | 3.8108          | 0.1717                                                                                                  | H-1→L (92%) H-2→L (3%)                                                                                      |
|          |                      | 313                  | 3.9633          | 0.0096                                                                                                  | H→L (12%), H→L+1 (52%), H→L+4 (10%) H-<br>1→L (2%), H→L+2 (4%), H→L+3 (9%), H→L+5<br>(3%), H→L+8 (4%)       |
|          |                      | 289                  | 4.2927          | 0.0935                                                                                                  | H-2→L (81%) H-3→L (5%), H-1→L (4%), H-<br>1→L+1 (3%)                                                        |
|          |                      | 277                  | 4.4784          | 0.0238                                                                                                  | H-4→L (26%), H-3→L (29%), H-1→L+1 (11%) H-<br>5→L (6%), H-2→L (4%), H-2→L+1 (3%), H→L+1<br>(6%), H→L+3 (4%) |
|          | 275                  | 4.5018               | 0.0095          | H→L+1 (33%), H→L+3 (24%), H→L+4 (10%) H-<br>4→L (6%), H-3→L (7%), H→L+2 (7%), H→L+5<br>(3%), H→L+7 (2%) |                                                                                                             |

|          |     |     |        |        |                                                                                                 |
|----------|-----|-----|--------|--------|-------------------------------------------------------------------------------------------------|
| <b>5</b> | 296 | 391 | 3.1735 | 0.001  | H→L (86%) H→L+1 (3%), H→L+3 (2%), H→L+4 (7%)                                                    |
|          |     | 324 | 3.8318 | 0.198  | H-1→L (95%) H-2→L (3%)                                                                          |
|          |     | 310 | 3.9998 | 0.0012 | H→L (13%), H→L+1 (40%), H→L+3 (11%), H→L+4 (25%) H→L+2 (3%), H→L+5 (2%), H→L+7 (2%), H→L+8 (2%) |
|          |     | 287 | 4.3207 | 0.0898 | H-2→L (79%) H-4→L (2%), H-3→L (3%), H-2→L+1 (2%), H-1→L (3%), H-1→L+1 (4%)                      |
|          |     | 278 | 4.4524 | 0.0128 | H→L+1 (53%), H→L+2 (13%), H→L+4 (17%) H→L+3 (9%), H→L+7 (3%)                                    |
|          |     | 273 | 4.5450 | 0.0688 | H-4→L (34%), H-3→L (28%) H-6→L (3%), H-5→L (9%), H-2→L (9%), H-2→L+1 (3%), H-1→L+1 (9%)         |
| <b>6</b> | 245 | 392 | 3.1623 | 0.0012 | H→L (87%) H→L+1 (3%), H→L+4 (8%)                                                                |
|          |     | 324 | 3.8246 | 0.2032 | H-1→L (95%) H-2→L (3%)                                                                          |
|          |     | 309 | 4.0120 | 0.0007 | H→L (12%), H→L+1 (37%), H→L+4 (33%) H→L+2 (9%), H→L+5 (2%), H→L+7 (2%), H→L+8 (3%)              |
|          |     | 288 | 4.3096 | 0.0988 | H-2→L (78%) H-3→L (6%), H-1→L (3%), H-1→L+1 (4%)                                                |
|          |     | 279 | 4.4362 | 0.0146 | H→L+1 (57%), H→L+2 (16%), H→L+4 (19%) H→L+7 (3%)                                                |
|          |     | 273 | 4.5435 | 0.0723 | H-4→L (37%), H-3→L (32%), H-2→L (10%) H-6→L (4%), H-2→L+1 (3%), H-1→L+1 (8%)                    |

H = HOMO, L = LUMO, H-1 = HOMO-1, L+1 = LUMO+1.

**Table S8:** Calculated vibrational frequencies of **compound 1**.

| DFT Frequencies | Scaling | Exp Frequencies | Intensities | Vibrational assignments                                                                   |
|-----------------|---------|-----------------|-------------|-------------------------------------------------------------------------------------------|
| 3886            | 3723    | 3687,3388       | 134.931     | $\nu(\text{O-H})$                                                                         |
| 3564            | 3414    |                 | 22.306      | $\nu(\text{N-H})$                                                                         |
| 3460            | 3315    | 3148            | 29.467      | $\nu(\text{N-H})^+$                                                                       |
| 3181            | 3047    | 3097            | 19.852      | $\nu_s(\text{C-H})$                                                                       |
| 3170            | 3037    | 3153            | 24.217      | $\nu_s(\text{C-H}_{\text{Ben}})^+ \nu(\text{N-H})$                                        |
| 3060            | 2931    |                 | 8.821       | $\nu(\text{C-H})$                                                                         |
| 3011            | 2885    | 3002            | 24.522      | $\nu_s(\text{C-H})^+ \nu(\text{N-H})$                                                     |
| 1692            | 1663    |                 | 19.022      | $\nu_{\text{as}}(\text{C-N})^+ \nu_s(\text{N-H})$                                         |
| 1649            | 1621    | 1548            | 23.154      | $\nu_s(\text{C=N})^+ \rho(\text{C-H})^+ \nu_s + \nu_{\text{as}}(\text{C-C}_{\text{Ben}})$ |
| 1659            | 1631    |                 | 3.4         | $\nu(\text{C-C}_{\text{Ben}})$                                                            |
| 1631            | 1603    |                 | 9.5421      | $\nu(\text{N-H})^+ \nu(\text{C-C}_{\text{Ben}})$                                          |
| 1546            | 1520    |                 | 350.670     | $\delta_{\text{as}}(\text{N-H})$                                                          |
| 1520            | 1494    |                 | 27.817      | $\nu_s + \nu_{\text{as}}(\text{C-C}_{\text{Ben}})$                                        |
| 1518            | 1492    |                 | 89.791      | $\nu(\text{C=C-C=C}_{\text{Ben}})$                                                        |
| 1514            | 1488    | 1523            | 361.227     | $\delta_{\text{as}}(\text{N-H})^+ \rho(\text{C-H}_{\text{Ben}})$                          |
| 1475            | 1450    |                 | 11.315      | $\nu(\text{C=C-C=C}_{\text{Ben}})$                                                        |
| 1471            | 1446    |                 | 18.932      | $\rho(\text{C-H})^+ \delta(\text{C-H})$                                                   |
| 1440            | 1416    |                 | 100.676     | $\rho(\text{C-H})^+ \delta(\text{C-H}_{\text{Ben}})$                                      |
| 1382            | 1359    |                 | 117.161     | $\rho(\text{C-H})^+ \rho(\text{N-H})^+$                                                   |



|      |      |      |         |                                                                                |
|------|------|------|---------|--------------------------------------------------------------------------------|
| 1361 | 1338 | 1326 | 338.200 | $\delta_{as}(\text{N-H}) + \delta(\text{C-H}_{\text{Ben}})$                    |
| 1278 | 1256 |      | 55.632  | $\rho(\text{N-H}) + \delta_{as}(\text{C-H}_{\text{Ben}})$                      |
| 1247 | 1226 | 1229 | 402.815 | $\nu(\text{C=S}) + \delta(\text{N-H})$                                         |
| 1167 | 1147 |      | 83.133  | $\delta + \rho(\text{C-H}_{\text{Ben}})$                                       |
| 1120 | 1101 |      | 99.986  | $\delta + \delta_{as}(\text{C-H}_{\text{Ben}})$                                |
| 1098 | 1079 |      | 7.656   | $\rho(\text{O-H}) + \delta + \delta_s(\text{C-H}_{\text{Ben}})$                |
| 1071 | 1053 |      | 49.055  | $\delta_{as}(\text{N-H}) + \delta(\text{C-H}_{\text{Ben}})$                    |
| 942  | 926  |      | 15.033  | $\delta(\text{N-H}) + \delta_{as}(\text{C-H}_{\text{Ben}})$                    |
| 925  | 909  |      | 23.207  | $\delta + \delta_{as}(\text{C-H}_{\text{Ben}}) + \nu(\text{C-Cl})$             |
| 866  | 851  |      | 39.348  | $\delta(\text{N-H}) + \delta_{as}(\text{C-H}_{\text{Ben}}) + \nu(\text{C-Cl})$ |
| 810  | 796  |      | 47.873  | $\delta(\text{C=N}) + \delta_s(\text{C-H}_{\text{Ben}})$                       |
| 721  | 709  |      | 22.724  | $\delta(\text{N-H}) + \rho(\text{C-H}_{\text{Ben}})$                           |
| 659  | 648  |      | 22.791  | $\nu(\text{C-Cl}) + \delta_{as}(\text{C-H}_{\text{Ben}})$                      |

**Table S9:** Calculated vibrational frequencies of **compound 2**.

| DFT  | Scaling | Exp  | Intensities | Vibrational assignments                                              |
|------|---------|------|-------------|----------------------------------------------------------------------|
| 3887 | 3724    | 3687 | 133.411     | $\nu(\text{O-H})$                                                    |
| 3573 | 3423    |      | 23.121      | $\nu(\text{N-H})$                                                    |
| 3463 | 3318    | 3323 | 29.718      | $\nu_{as}(\text{N-H})$                                               |
| 3192 | 3058    |      | 1.332       | $\nu_s(\text{C-H}_{\text{Ben}})$                                     |
| 3189 | 3055    |      | 6.926       | $\nu_s(\text{C-H}_{\text{Ben}}) + \nu(\text{N-H})$                   |
| 3179 | 3045    | 3187 | 12.472      | $\nu_{as}(\text{C-H}_{\text{Ben}})$                                  |
| 3144 | 3012    | 3125 | 13.545      | $\nu(\text{C-H}) + \nu(\text{N-H})$                                  |
| 3068 | 2939    |      | 6.536       | $\nu(\text{C-H})$                                                    |
| 3024 | 2897    | 3062 | 20.888      | $\nu(\text{C-H})$                                                    |
| 1691 | 1662    |      | 18.742      | $\nu(\text{C-H}) + \nu(\text{N-H})$                                  |
| 1669 | 1641    |      | 13.220      | $\nu(\text{C=C-C=C}_{\text{Ben}})$                                   |
| 1648 | 1620    |      | 22.336      | $\nu_s(\text{C-H}_{\text{Ben}}) + \nu(\text{C=C-C=C}_{\text{Ben}})$  |
| 1642 | 1614    |      | 18.024      | $\nu(\text{C=C-C=C}_{\text{Ben}})$                                   |
| 1548 | 1522    | 1532 | 379.589     | $\nu_s(\text{C-H}) + \nu(\text{C=N})$                                |
| 1526 | 1500    | 1532 | 84.595      | $\nu(\text{C=C-C=C}_{\text{Ben}})$                                   |
| 1518 | 1492    |      | 130.199     | $\nu(\text{C=C-C=C}_{\text{Ben}}) + \nu(\text{N-H})$                 |
| 1516 | 1490    | 1532 | 326.421     | $\delta_{as}(\text{N-H})$                                            |
| 1474 | 1449    |      | 36.383      | $\delta(\text{C-H}) + \rho(\text{C-H}_{\text{Ben}})$                 |
| 1439 | 1415    |      | 100.410     | $\delta(\text{C-H}_{\text{Ben}}) + \nu(\text{C=C-C=C}_{\text{Ben}})$ |
| 1382 | 1359    |      | 228.540     | $\delta(\text{C-H}) + \rho(\text{N-H})$                              |
| 1360 | 1337    |      | 305.704     | $\delta(\text{C-H}_{\text{Ben}}) + \delta_s(\text{N-H})$             |
| 1280 | 1258    |      | 60.763      | $\nu(\text{F-C}_{\text{Ben}}) + \rho(\text{C-H}_{\text{Ben}})$       |
| 1246 | 1225    |      | 374.193     | $\rho(\text{N-H})$                                                   |
| 1231 | 1210    | 1222 | 59.243      | $\delta_{as}(\text{N-H}) + \nu(\text{C=S})$                          |
| 1220 | 1199    |      | 19.873      | $\delta_{as}(\text{O-H}) + \delta_{as}(\text{C-H}_{\text{Ben}})$     |
| 1167 | 1147    |      | 82.356      | $\delta + \rho(\text{C-H}_{\text{Ben}})$                             |
| 1120 | 1101    |      | 100.367     | $\delta + \delta_{as}(\text{C-H}_{\text{Ben}}) +$                    |
| 1117 | 1098    |      | 13.660      | $\delta + \delta_{as}(\text{C-H}_{\text{Ben}})$                      |

|      |      |        |                                                                               |
|------|------|--------|-------------------------------------------------------------------------------|
| 1073 | 1055 | 51.450 | $\delta(\text{C-H}_{\text{Ben}}) + \delta_{\text{as}}(\text{N-H})$            |
| 1052 | 1034 | 7.933  | $\delta + \delta_{\text{s}}(\text{C-H}_{\text{Ben}})$                         |
| 951  | 935  | 6.012  | $\delta + \delta_{\text{as}}(\text{C-H}_{\text{Ben}})$                        |
| 941  | 925  | 13.569 | $\delta_{\text{as}}(\text{C-H}_{\text{Ben}})$                                 |
| 924  | 908  | 18.776 | $\nu(\text{C-Cl}) + \delta_{\text{as}}(\text{C-H}_{\text{Ben}})$              |
| 866  | 851  | 33.388 | $\delta_{\text{as}}(\text{C-H}_{\text{Ben}}) + \delta_{\text{s}}(\text{N-H})$ |
| 810  | 796  | 43.127 | $\delta_{\text{s}}(\text{C-H}_{\text{Ben}}) + \delta(\text{N-H})$             |
| 805  | 791  | 21.805 | $\nu(\text{C-F}) + \delta(\text{N-H})$                                        |
| 797  | 783  | 35.216 | $\nu(\text{C-S}) + \delta_{\text{as}}(\text{N-H}) + \nu(\text{C-F})$          |
| 764  | 751  | 60.500 | $\delta_{\text{s}}(\text{C-H}_{\text{Ben}})$                                  |
| 659  | 648  | 23.056 | $\nu(\text{C-Cl}) + \delta_{\text{as}}(\text{C-H}_{\text{Ben}})$              |

**Table S10:** Calculated vibrational frequencies of **compound 3**.

| DFT<br>Frequencies | Scaling | Exp<br>Frequencies | Intensities | Vibrational assignments                                                                            |
|--------------------|---------|--------------------|-------------|----------------------------------------------------------------------------------------------------|
| 3889               | 3726    | 3656               | 135.643     | $\nu(\text{O-H})$                                                                                  |
| 3561               | 3411    |                    | 20.940      | $\nu(\text{N-H})$                                                                                  |
| 3456               | 3311    | 3450               | 30.635      | $\nu(\text{N-H})$                                                                                  |
| 3164               | 3031    | 3187               | 5.821       | $\nu_{\text{as}}(\text{C-H}_{\text{Ben}}) + \nu(\text{N-H})$                                       |
| 3163               | 3030    | 3125               | 6.603       | $\nu_{\text{as}}(\text{C-H}) + \nu(\text{N-H})$                                                    |
| 3150               | 3018    |                    | 13.855      | $\nu_{\text{as}}(\text{C-H}_{\text{Ben}})$                                                         |
| 3053               | 2925    | 3094               | 8.431       | $\nu_{\text{as}}(\text{C-H})$                                                                      |
| 3010               | 2884    |                    | 23.887      | $\nu_{\text{s}}(\text{C-H})$                                                                       |
| 1693               | 1664    |                    | 16.881      | $\nu_{\text{as}}(\text{C-N})$                                                                      |
| 1664               | 1636    |                    | 37.374      | $\delta(\text{C-H}) + \nu(\text{C=C-C=C}_{\text{Ben}})$                                            |
| 1648               | 1620    | 1548               | 22.037      | $\nu_{\text{as}}(\text{C=N}) + \rho(\text{C-H}) + \nu(\text{C=C-C=C}_{\text{Ben}})$                |
| 1544               | 1518    | 1530               | 77.449      | $\nu(\text{C=C-C=C}_{\text{Ben}}) + \nu(\text{N-H})$                                               |
| 1534               | 1508    |                    | 452.470     | $\nu_{\text{as}}(\text{N-H}) + \delta(\text{C-H}_{\text{Ben}}) + \nu(\text{C=C-C=C}_{\text{Ben}})$ |
| 1517               | 1491    | 1530               | 111.130     | $\rho(\text{N-H}) + \delta(\text{C-H}_{\text{Ben}}) + \nu(\text{C=C-C=C}_{\text{Ben}})$            |
| 1508               | 1482    |                    | 321.428     | $\nu_{\text{as}}(\text{N-H}) + \delta_{\text{as}}(\text{C-H}_{\text{Ben}})$                        |
| 1474               | 1449    |                    | 19.621      | $\delta(\text{C-H}) + \rho(\text{N-H})$                                                            |
| 1441               | 1417    |                    | 36.316      | $\delta(\text{C-H}_{\text{Ben}}) + \nu(\text{O-H}) + \nu(\text{C=C-C=C}_{\text{Ben}})$             |
| 1441               | 1417    |                    | 67.547      | $\delta(\text{N-H}) + \delta(\text{C-H}_{\text{Ben}}) + \nu(\text{C=C-C=C}_{\text{Ben}})$          |
| 1377               | 1354    |                    | 195.973     | $\delta_{\text{as}}(\text{N-H}) + \delta(\text{C=C}_{\text{Ben}})$                                 |
| 1357               | 1334    |                    | 362.409     | $\nu(\text{C=S}) + \nu_{\text{as}}(\text{N-H})$                                                    |
| 1314               | 1292    |                    | 100.262     | $\nu(\text{C-O}) + \delta_{\text{as}}(\text{C-H}_{\text{Ben}})$                                    |
| 1281               | 1259    |                    | 105-650     | $\delta_{\text{as}}(\text{F-C}_{\text{Ben}}) + \rho(\text{N-H}) + \rho(\text{C-H})$                |
| 1240               | 1219    | 1217               | 366.156     | $\nu(\text{C=S}) + \rho(\text{N-H})$                                                               |
| 1170               | 1150    |                    | 75.811      | $\delta(\text{C-H}_{\text{Ben}})$                                                                  |

|      |      |         |                                                                                       |
|------|------|---------|---------------------------------------------------------------------------------------|
| 1121 | 1102 | 106.911 | $\delta(\text{O-H}) + \delta(\text{C-H}_{\text{Ben}})$                                |
| 1069 | 1051 | 49.021  | $\nu_{\text{as}}(\text{N-N}) + \delta_{\text{as}}(\text{C-H}_{\text{Ben}})$           |
| 1021 | 1004 | 5.746   | $\delta(\text{C-H}_{\text{Ben}})$                                                     |
| 941  | 925  | 14.956  | $\delta_{\text{as}}(\text{C-H}_{\text{Ben}})$                                         |
| 923  | 907  | 17.274  | $\delta(\text{N-H}) + \delta_{\text{as}}(\text{C-H}_{\text{Ben}}) + \nu(\text{C-Cl})$ |
| 874  | 859  | 17.928  | $\nu(\text{C-F}) + \delta(\text{C-H}_{\text{Ben}})$                                   |
| 864  | 849  | 63.787  | $\delta_{\text{as}}(\text{N-H}) + \delta(\text{C-H}_{\text{Ben}}) + \nu(\text{C-Cl})$ |
| 845  | 831  | 46.026  | $\nu(\text{C-F})$                                                                     |
| 794  | 781  | 33.388  | $\nu(\text{C=S}) + \delta_{\text{s}}(\text{C-H}_{\text{Ben}}) + \nu(\text{C-Cl})$     |
| 718  | 706  | 4.521   | $\nu_{\text{as}}(\text{C-F}) + \delta_{\text{s}}(\text{C-H}_{\text{Ben}})$            |
| 659  | 648  | 24.516  | $\nu_{\text{as}}(\text{C-Cl}) + \delta_{\text{as}}(\text{C-H}_{\text{Ben}})$          |

**Table S11:** Calculated vibrational frequencies of **compound 4**.

| DFT Frequencies | Scaling | Exp Frequencies | Intensities | Vibrational assignments                                                                                          |
|-----------------|---------|-----------------|-------------|------------------------------------------------------------------------------------------------------------------|
| 3887            | 3724    | 3386            | 139.268     | $\nu(\text{O-H})$                                                                                                |
| 3572            | 3422    |                 | 21.457      | $\nu(\text{N-H})$                                                                                                |
| 3458            | 3313    |                 | 27.984      | $\nu(\text{N-H})$                                                                                                |
| 3177            | 3044    |                 | 24.938      | $\nu_{\text{s}}(\text{C-H}_{\text{Ben}})$                                                                        |
| 3163            | 3030    | 3134            | 21.729      | $\nu_{\text{as}}(\text{C-H}_{\text{Ben}}) + \nu(\text{N-H})$                                                     |
| 3112            | 2981    |                 | 13.912      | $\nu_{\text{s}}(\text{CH-CH}_3)$                                                                                 |
| 3075            | 2946    |                 | 28.419      | $\nu_{\text{as}}(\text{CH-CH}_3)$                                                                                |
| 3019            | 2892    |                 | 42.658      | $\nu(\text{C-H}) + \nu(\text{N-H})$                                                                              |
| 3015            | 2888    | 2996            | 39.611      | $\nu_{\text{s}}(\text{C-H}) + \nu_{\text{as}}(\text{CH-CH}_3)$                                                   |
| 1691            | 1662    |                 | 14.347      | $\nu_{\text{s}}(\text{N-H}) + \nu_{\text{as}}(\text{C=N})$                                                       |
| 1652            | 1624    |                 | 24.582      | $\nu_{\text{as}}(\text{C-H}_{\text{Ben}}) + \nu(\text{C=C-C=C}_{\text{Ben}})$                                    |
| 1550            | 1524    | 1541            | 329.194     | $\nu_{\text{as}}(\text{N-H}) + \nu_{\text{s}}(\text{C=N}) + \nu(\text{C=C-C=C}_{\text{Ben}})$                    |
| 1522            | 1496    |                 | 132.885     | $\nu(\text{C=C-C=C}_{\text{Ben}}) + \nu_{\text{as}}(\text{N-H}) + \nu_{\text{s}}(\text{C=N})$                    |
| 1518            | 1492    |                 | 201.412     | $\delta_{\text{s}}(\text{C-H}_{\text{Ben}}) + \delta_{\text{as}}(\text{N-H}) + \nu(\text{C=C-C=C}_{\text{Ben}})$ |
| 1499            | 1474    |                 | 12.956      | $\delta_{\text{as}}(\text{C-CH}_3) + \delta_{\text{s}}(\text{C-H}_{\text{Ben}})$                                 |
| 1442            | 1417    |                 | 101.916     | $\delta_{\text{as}}(\text{C-H}_{\text{Ben}}) + \nu(\text{C=C-C=C}_{\text{Ben}})$                                 |
| 1387            | 1363    |                 | 236.482     | $\delta_{\text{as}}(\text{C-H}_{\text{Ben}}) + \delta_{\text{as}}(\text{N-H})$                                   |
| 1352            | 1329    |                 | 188.576     | $\delta(\text{C-H}) + \nu(\text{C=S}) + \delta_{\text{as}}(\text{N-H})$                                          |
| 1254            | 1233    |                 | 305.280     | $\delta_{\text{s}}(\text{C-H}_{\text{Ben}}) + \delta_{\text{as}}(\text{N-H})$                                    |
| 1240            | 1219    | 1228            | 73.868      | $\nu_{\text{as}}(\text{C=S}) + \delta_{\text{as}}(\text{N-H})$                                                   |
| 1170            | 1150    |                 | 82.895      | $\delta_{\text{as}}(\text{C-H}_{\text{Ben}}) + \rho(\text{N-H})$                                                 |
| 1124            | 1105    |                 | 100.990     | $\delta_{\text{as}}(\text{C-H}_{\text{Ben}}) + \nu_{\text{as}}(\text{O-H}) + \nu_{\text{as}}(\text{C-Cl})$       |
| 1075            | 1057    |                 | 11.838      | $\delta(\text{C-H}_{\text{Ben}}) + \delta_{\text{as}}(\text{N-H})$                                               |
| 959             | 943     |                 | 19.467      | $\delta_{\text{as}}(\text{C-H}_{\text{Ben}})$                                                                    |
| 926             | 910     |                 | 19.231      | $\delta(\text{N-H}) + \delta_{\text{as}}(\text{C-H}_{\text{Ben}}) + \nu(\text{C-Cl})$                            |

|     |     |     |        |                                                                                   |
|-----|-----|-----|--------|-----------------------------------------------------------------------------------|
| 868 | 853 | 829 | 33.206 | $\delta(\text{C-H}_{\text{Ben}})+\delta_{\text{as}}(\text{N-H})+\nu(\text{C-Cl})$ |
| 807 | 793 |     | 43.405 | $\rho(\text{C-H}_{\text{Ben}})+\delta_{\text{s}}(\text{C=N})$                     |
| 799 | 785 |     | 37.255 | $\delta_{\text{as}}(\text{C-H}_{\text{Ben}})+\delta_{\text{s}}(\text{N-H})$       |
| 755 | 742 |     | 21.015 | $\delta_{\text{as}}(\text{C-H}_{\text{Ben}})$                                     |
| 659 | 648 |     | 21.957 | $\delta(\text{C-H}_{\text{Ben}})+\nu(\text{C-Cl})$                                |

**Table S12:** Calculated vibrational frequencies of **compound 5**.

| DFT Frequencies | Scaling | Exp Frequencies | Intensities | Vibrational assignments                                                                                        |
|-----------------|---------|-----------------|-------------|----------------------------------------------------------------------------------------------------------------|
| 3888            | 3725    | 3687            | 135.094     | $\nu(\text{O-H})$                                                                                              |
| 3565            | 3415    |                 | 22.939      | $\nu(\text{N-H})$                                                                                              |
| 3458            | 3313    | 3342            | 28.617      | $\nu(\text{N-H})$                                                                                              |
| 3177            | 3044    | 3218            | 21.844      | $\nu_{\text{s}}(\text{C-H}_{\text{Ben}})+\nu(\text{N-H})$                                                      |
| 3156            | 3023    | 3125            | 11.706      | $\nu_{\text{as}}(\text{C-H}_{\text{Ben}})+\nu(\text{N-H})$                                                     |
| 3115            | 2984    |                 | 15.496      | $\nu_{\text{s}}(\text{CH-CH}_3)$                                                                               |
| 3090            | 2960    | 3094            | 16.317      | $\nu(\text{C-H})$                                                                                              |
| 3022            | 2895    |                 | 26.221      | $\nu_{\text{s}}(\text{CH-CH}_3)+\nu(\text{N-H})$                                                               |
| 3009            | 2883    |                 | 26.585      | $\nu(\text{C-H})$                                                                                              |
| 1687            | 1658    |                 | 20.152      | $\delta(\text{N-H})+\nu_{\text{as}}(\text{C=N})+\nu_{\text{as}}(\text{C-H}_{\text{Ben}})$                      |
| 1661            | 1633    |                 | 11.975      | $\delta(\text{C-H}_{\text{Ben}})+\delta_{\text{as}}(\text{C+H}_{\text{Ben}})+\nu(\text{C=C-C=C}_{\text{Ben}})$ |
| 1655            | 1627    |                 | 25.203      | $\delta_{\text{as}}(\text{C-H}_{\text{Ben}})+\nu(\text{C=C-C=C}_{\text{Ben}})$                                 |
| 1546            | 1520    | 1543            | 324.181     | $\nu(\text{C=N})+\delta_{\text{as}}(\text{N-H})+\delta(\text{C-H})$                                            |
| 1521            | 1495    |                 | 184.742     | $\nu_{\text{as}}(\text{O-H})+\nu(\text{C-Cl})+\nu_{\text{as}}(\text{N-H})+$                                    |
| 1519            | 1493    |                 | 207.601     | $\nu_{\text{as}}(\text{N-H})+\delta(\text{C-H}_{\text{Ben}})+\nu(\text{C=S})+\nu(\text{C=C-C=C}_{\text{Ben}})$ |
| 1514            | 1488    | 1538            | 99.601      | $\nu(\text{C=C-C=C}_{\text{Ben}})+\nu_{\text{as}}(\text{CH-CH}_3)$                                             |
| 1487            | 1462    |                 | 18.463      | $\rho(\text{N-H})+\delta(\text{C-H}_{\text{Ben}})$                                                             |
| 1472            | 1447    |                 | 18.627      | $\delta(\text{C-H})+\delta_{\text{as}}(\text{CH-CH}_3)+\rho(\text{N-H})$                                       |
| 1443            | 1418    |                 | 97.547      | $\nu(\text{C-Cl})+\delta+\delta_{\text{s}}(\text{C-H}_{\text{Ben}})+\nu(\text{C=C-C=C}_{\text{Ben}})$          |
| 1314            | 1292    |                 | 95.625      | $\delta_{\text{as}}(\text{C-H}_{\text{Ben}})+\nu(\text{C=O})$                                                  |
| 1278            | 1256    |                 | 51.554      | $\delta_{\text{as}}(\text{C-H}_{\text{Ben}})+\rho(\text{N-H})$                                                 |
| 1272            | 1250    |                 | 51.147      | $\delta(\text{C-H}_{\text{Ben}})+\rho(\text{N-H})$                                                             |
| 1241            | 1220    | 1223            | 389.142     | $\nu(\text{C=S})+\delta_{\text{as}}(\text{N-H})$                                                               |
| 1170            | 1150    |                 | 75.091      | $\delta+\rho(\text{C-H}_{\text{Ben}})+\nu(\text{C=O})$                                                         |
| 1123            | 1104    |                 | 109.157     | $\nu(\text{C-Cl})+\delta_{\text{as}}(\text{C-H}_{\text{Ben}})$                                                 |
| 1070            | 1052    |                 | 45.023      | $\nu(\text{C=S})+\delta+\rho(\text{C-H}_{\text{Ben}})$                                                         |
| 1050            | 1032    |                 | 4.935       | $\delta_{\text{as}}(\text{CH-CH}_3)+\rho(\text{C-H}_{\text{Ben}})$                                             |
| 942             | 926     |                 | 16.767      | $\delta_{\text{as}}(\text{C-H}_{\text{Ben}})+\nu(\text{C-Cl})$                                                 |
| 925             | 909     |                 | 24.717      | $\nu(\text{C-Cl})+\delta_{\text{as}}(\text{C-H}_{\text{Ben}})+\delta(\text{N-H})$                              |
| 864             | 849     |                 | 50.460      | $\nu(\text{C-Cl})+\delta(\text{C-H}_{\text{Ben}})+\nu_{\text{as}}(\text{C=S})$                                 |
| 811             | 797     |                 | 49.526      | $\rho(\text{C-H}_{\text{Ben}})+\delta_{\text{as}}(\text{N-H})$                                                 |
| 792             | 779     |                 | 22.361      | $\delta(\text{C-H}_{\text{Ben}})+\nu(\text{C=O})+\delta_{\text{as}}(\text{C=S})+$                              |
| 722             | 710     |                 | 14.964      | $\delta_{\text{as}}(\text{C-H}_{\text{Ben}})$                                                                  |
| 660             | 649     |                 | 21.927      | $\nu(\text{C-Cl})+\delta+\rho(\text{C-H}_{\text{Ben}})$                                                        |

**Table S13:** Calculated vibrational frequencies of **compound 6**.

| DFT Frequencies | Scaling | Exp Frequencies | Intensities | Vibrational assignments                                                                                                 |
|-----------------|---------|-----------------|-------------|-------------------------------------------------------------------------------------------------------------------------|
| 3890            | 3727    | 3719            | 134.631     | $\nu(\text{O-H})$                                                                                                       |
| 3565            | 3415    |                 | 23.549      | $\nu(\text{N-H})$                                                                                                       |
| 3456            | 3311    | 3282            | 27.648      | $\nu(\text{N-H})$                                                                                                       |
| 3160            | 3027    |                 | 25.142      | $\nu_s(\text{C-H}_{\text{Ben}})$                                                                                        |
| 3149            | 3017    | 3130            | 14.241      | $\nu_{\text{as}}(\text{C-H}) + \nu(\text{N-H})$                                                                         |
| 3112            | 2981    | 3094            | 13.257      | $\nu_{\text{as}}(\text{CH-CH}_3) + \nu(\text{N-H})$                                                                     |
| 3085            | 2955    |                 | 13.854      | $\nu_s(\text{C-H}) + \nu_{\text{as}}(\text{CH-CH}_3)$                                                                   |
| 3019            | 2892    | 2988            | 35.283      | $\nu_s(\text{C-H})$                                                                                                     |
| 3010            | 2884    |                 | 21.449      | $\nu_s(\text{C-H})$                                                                                                     |
| 1694            | 1665    |                 | 19.957      | $\nu_{\text{as}}(\text{N-H}) + \delta + \delta_{\text{as}}(\text{C-H}_{\text{Ben}})$                                    |
| 1649            | 1621    | 1539            | 21.932      | $\nu(\text{C-Cl}) + \nu(\text{C=N}) + \nu(\text{C=C-C=C}_{\text{Ben}})$                                                 |
| 1534            | 1508    | 1532            | 433.191     | $\delta_s(\text{C-H}_{\text{Ben}}) + \nu(\text{C=C-C=C}_{\text{Ben}})$                                                  |
| 1518            | 1492    | 1514            | 112.702     | $\nu(\text{C=O}) + \delta_{\text{as}}(\text{N-H}) + \delta(\text{C-H}_{\text{Ben}}) + \nu(\text{C=C-C=C}_{\text{Ben}})$ |
| 1509            | 1483    |                 | 337.185     | $\delta(\text{N-H}) + \rho(\text{C-H}_{\text{Ben}}) + \nu(\text{C=O})$                                                  |
| 1476            | 1451    |                 | 19.037      | $\delta_{\text{as}}(\text{CH-CH}_3) + \rho(\text{N-H}) + \delta(\text{C-H}_{\text{Ben}})$                               |
| 1471            | 1446    |                 | 19.342      | $\delta + \delta_{\text{as}}(\text{C-H}_{\text{Ben}}) + \nu(\text{C=C-C=C}_{\text{Ben}})$                               |
| 1456            | 1431    |                 | 8.598       | $\delta_{\text{as}}(\text{C-CH}_3)$                                                                                     |
| 1441            | 1417    |                 | 98.729      | $\nu_{\text{as}}(\text{C=O}) + \delta + \delta_s(\text{C-H}_{\text{Ben}}) + \nu(\text{C=C-C=C}_{\text{Ben}})$           |
| 1378            | 1355    |                 | 220.683     | $\nu(\text{C=S}) + \rho(\text{N-H}) + \delta + \delta_{\text{as}}(\text{C-H}_{\text{Ben}})$                             |
| 1357            | 1334    |                 | 330.549     | $\nu(\text{C=S}) + \delta_s(\text{N-H}) + \rho(\text{C-H}_{\text{Ben}})$                                                |
| 1238            | 1217    | 1225            | 177.045     | $\rho(\text{N-H}) + \nu(\text{C=S})$                                                                                    |
| 1237            | 1216    |                 | 149.108     | $\nu(\text{C=S}) + \rho(\text{N-H}) + \delta_s(\text{C-H}_{\text{Ben}})$                                                |
| 1170            | 1150    |                 | 76.243      | $\nu_{\text{as}}(\text{O-H}) + \nu(\text{C-Cl}) + \delta + \rho(\text{C-H}_{\text{Ben}})$                               |
| 1121            | 1102    |                 | 106.527     | $\nu(\text{C=O}) + \delta + \delta_{\text{as}}(\text{C-H}_{\text{Ben}})$                                                |
| 1070            | 1052    |                 | 47.232      | $\delta + \rho(\text{C-H}_{\text{Ben}}) + \delta_{\text{as}}(\text{C=N}) + \nu(\text{C=S})$                             |
| 1041            | 1023    |                 | 8.808       | $\nu_{\text{as}}(\text{CH-CH}_3) + \rho + \delta_s(\text{C-H}_{\text{Ben}})$                                            |
| 941             | 925     |                 | 14.291      | $\nu(\text{C-Cl}) + \delta_{\text{as}}(\text{C-H}_{\text{Ben}})$                                                        |
| 923             | 907     |                 | 16.554      | $\nu(\text{C-Cl}) + \delta_{\text{as}}(\text{C-H}_{\text{Ben}}) + \delta(\text{N-H})$                                   |
| 861             | 846     |                 | 51.237      | $\delta_{\text{as}}(\text{N-H}) + \nu(\text{C=S}) + \nu(\text{C=O}) + \nu(\text{C-Cl})$                                 |
| 810             | 796     |                 | 41.215      | $\delta_{\text{as}}(\text{C-H}_{\text{Ben}}) + \nu_{\text{as}}(\text{C=O})$                                             |
| 792             | 779     |                 | 35.362      | $\nu(\text{C=S}) + \nu_{\text{as}}(\text{C=O}) + \delta(\text{N-H})$                                                    |
| 786             | 773     |                 | 3.850       | $\rho + \delta_s(\text{C-H}_{\text{Ben}}) + \nu(\text{C=S})$                                                            |
| 659             | 648     |                 | 23.202      | $\nu_{\text{as}}(\text{C=O}) + \delta_s(\text{N-H}) + \delta_{\text{as}}(\text{C-H}_{\text{Ben}}) + \nu(\text{C-Cl})$   |
| 629             | 618     |                 | 14.733      | $\nu_{\text{as}}(\text{C=S}) + \nu(\text{C-Cl}) + \delta(\text{C-H}_{\text{Ben}})$                                      |

Frequencies are given in  $\text{cm}^{-1}$ ,  $\nu$ =stretching,  $\beta$ =in-plane bending,  $\gamma$ =out-plane bending,  $\delta$ =scissoring,  $\rho$ =rocking,  $w$ =wagging,  $s$ =symmetric,  $as$ =asymmetric,  $\tau$ =twisting, Ben=benzene ring.

**Table S14.** Frontier molecular orbital energies of **Compounds 1-6.**

|                         | <b>1</b>     |           | <b>2</b>     |           | <b>3</b>     |           | <b>4</b>     |           | <b>5</b>     |           | <b>6</b>     |           |
|-------------------------|--------------|-----------|--------------|-----------|--------------|-----------|--------------|-----------|--------------|-----------|--------------|-----------|
| <b>MO<sub>(s)</sub></b> | <b>E(eV)</b> | <b>ΔE</b> |
| HOMO-1                  | -6.284       | 5.523     | -6.244       | 5.495     | -6.354       | 5.533     | -6.291       | 5.468     | -6.263       | 5.498     | -6.241       | 5.499     |
| LUMO+1                  | -0.761       |           | -0.749       |           | -0.821       |           | -0.823       |           | -0.765       |           | -0.742       |           |
| HOMO-2                  | -6.858       |           | -6.832       |           | -6.918       |           | -6.850       |           | -6.841       |           | -6.811       |           |
| LUMO+2                  | -0.492       | 6.366     | -0.702       | 6.13      | -0.726       | 6.192     | -0.396       | 6.454     | -0.442       | 6.399     | -0.411       | 6.4       |

E = energy, ΔE = E<sub>LUMO</sub>-E<sub>HOMO</sub>, MO(s) = molecular orbitals, HOMO = highest occupied molecular orbital, LUMO = lowest unoccupied molecular orbital.

**Table S15.** Polarizability in unit a.u of the studied **compounds 1-6.**

| <b>Polarizability</b> | <b>1</b> | <b>2</b> | <b>3</b> | <b>4</b> | <b>5</b> | <b>6</b> |
|-----------------------|----------|----------|----------|----------|----------|----------|
| $\alpha_{xx}$         | 265.957  | 258.305  | 263.797  | 281.227  | 275.51   | 280.456  |
| $\alpha_{yy}$         | 266.052  | 263.095  | 267.861  | 271.942  | 285.626  | 287.266  |
| $\alpha_{zz}$         | 161.144  | 169.774  | 161.502  | 171.918  | 169.131  | 169.383  |
| $\alpha_{total}$      | 231.051  | 230.391  | 231.053  | 241.695  | 243.422  | 245.701  |

$\alpha$  = polarizability

**Table S16.** Hyperpolarizability in unit a.u of the studied **Compounds 1-6.**

| <b>Hyperpolarizability</b> | <b>1</b> | <b>2</b> | <b>3</b> | <b>4</b> | <b>5</b> | <b>6</b> |
|----------------------------|----------|----------|----------|----------|----------|----------|
| $\beta_{xxx}$              | 17.235   | 122.278  | 32.12    | -89.754  | 55.285   | -19.555  |
| $\beta_{xxy}$              | -131.492 | -147.897 | -34.611  | -154.108 | -137.458 | -86.067  |
| $\beta_{xyy}$              | -20.545  | -14.754  | -97.256  | 2.307    | -12.974  | 74.15    |
| $\beta_{yyy}$              | -211.872 | -207.695 | -113.713 | -205.311 | -206.471 | -214.305 |
| $\beta_{xxz}$              | -58.489  | -113.2   | -37.352  | -32.267  | -32.909  | 33.973   |
| $\beta_{yyz}$              | -22.352  | -34.92   | 2.651    | 11.931   | -57.926  | 19.454   |
| $\beta_{xzz}$              | 11.831   | 68.652   | 23.575   | 7.152    | -1.024   | -46.386  |

|                 |         |          |         |         |         |         |
|-----------------|---------|----------|---------|---------|---------|---------|
| $\beta_{yzz}$   | -30.593 | -42.701  | -26.705 | -39.83  | -24.414 | -36.445 |
| $\beta_{zzz}$   | -39.08  | -100.951 | -34.588 | -16.763 | -30.724 | 39.178  |
| $\beta_{total}$ | 392.807 | 501.709  | 192.778 | 408.93  | 390.074 | 349.412 |

$\beta$  = hyperpolarizability

**Table S17.** Dipole moment in unit debye of the studied **Compounds 1-6.**

| Dipole moment | 1       | 2       | 3       | 4       | 5       | 6       |
|---------------|---------|---------|---------|---------|---------|---------|
| $\mu_x$       | 2.8122  | 1.9416  | 3.0797  | 3.3364  | -2.4592 | 1.6493  |
| $\mu_y$       | -5.2381 | -5.3212 | -4.5110 | -5.1885 | 5.6831  | -6.2007 |
| $\mu_z$       | 4.4826  | 5.5825  | 4.1008  | 4.3639  | 4.4947  | 4.1709  |
| $\mu_{total}$ | 7.4458  | 7.9529  | 6.8301  | 7.5562  | 7.6516  | 7.6528  |

$\mu$  = dipole moment

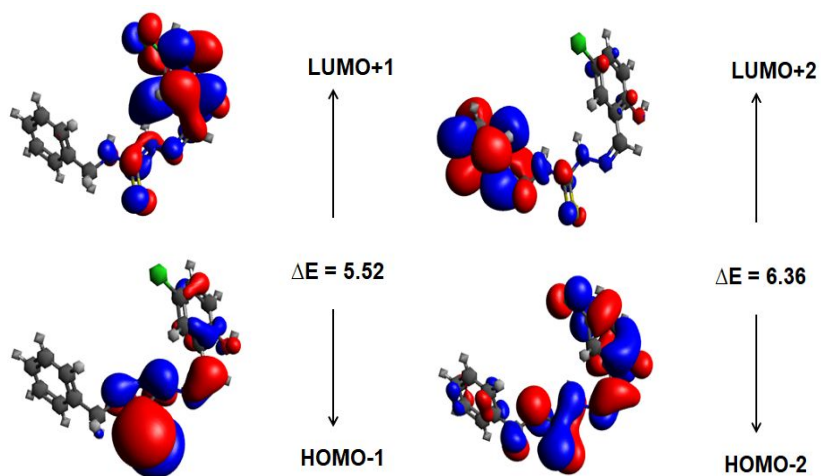

**Compound 1**

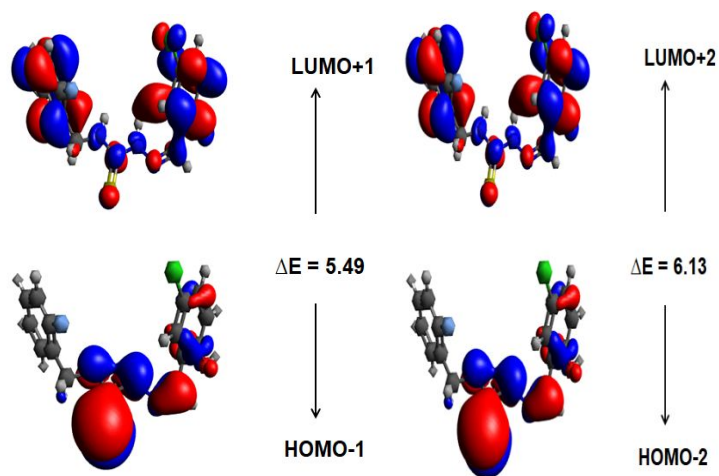

### Compound 2

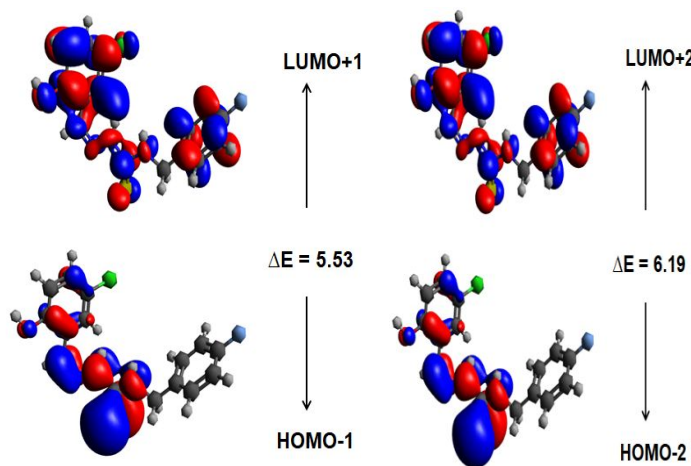

### Compound 3

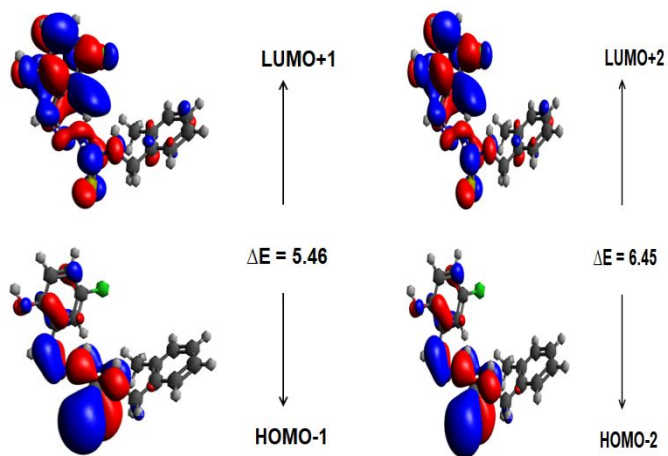



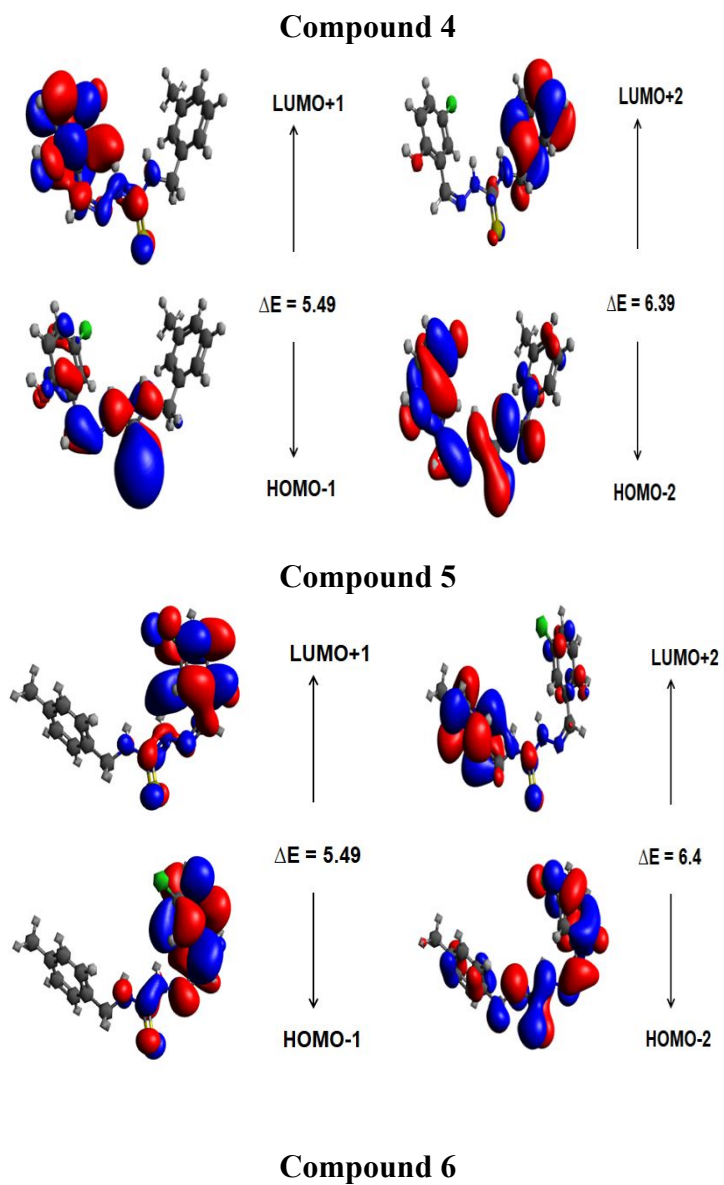

**Figure S1:** Frontier molecular orbitals of entitled compounds.

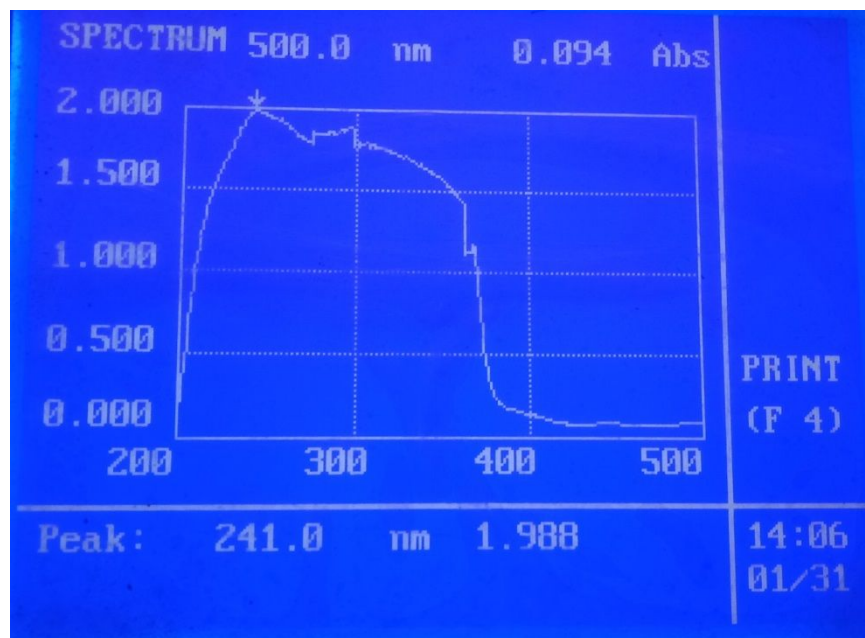

**Figure S2:** UV-Vis spectra of compound 1.

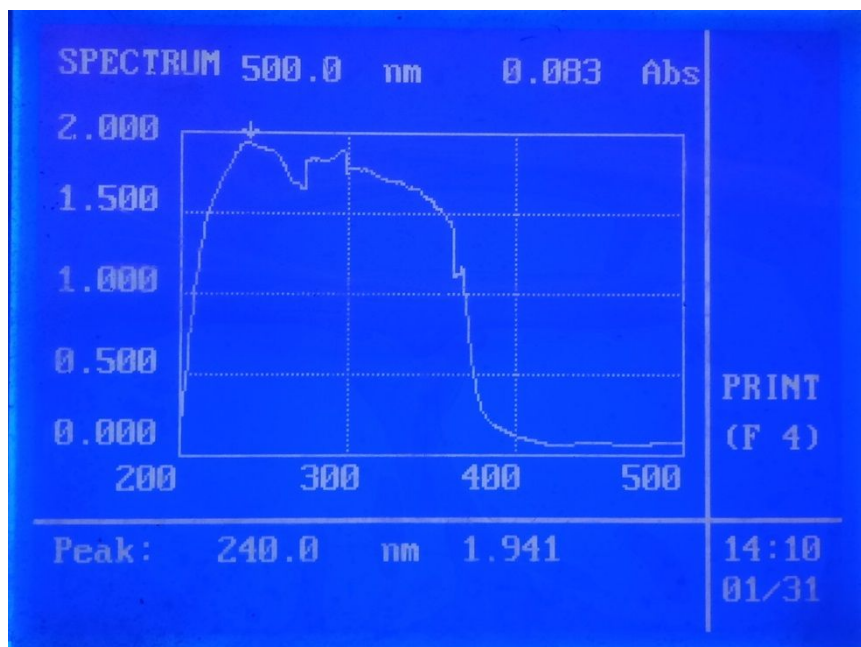

**Figure S3:** UV-Vis spectra of compound 2.

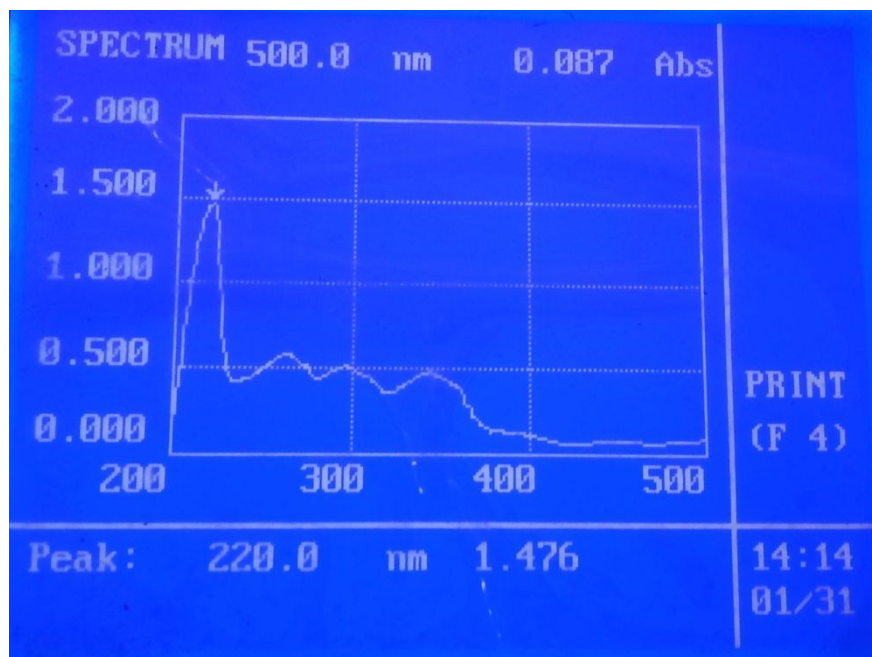

Figure S4: UV-Vis spectra of compound 3.

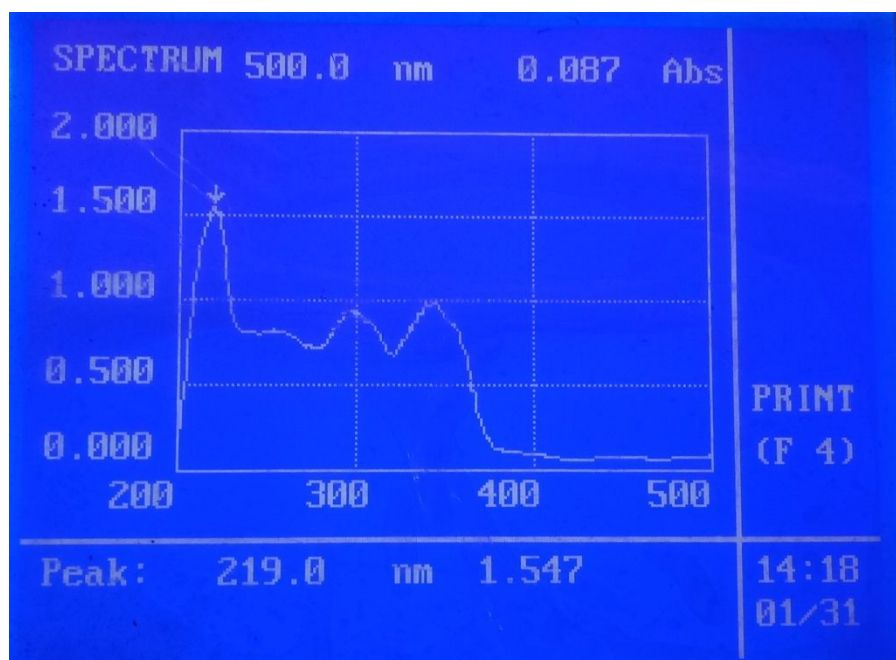

Figure S5: UV-Vis spectra of compound 4.

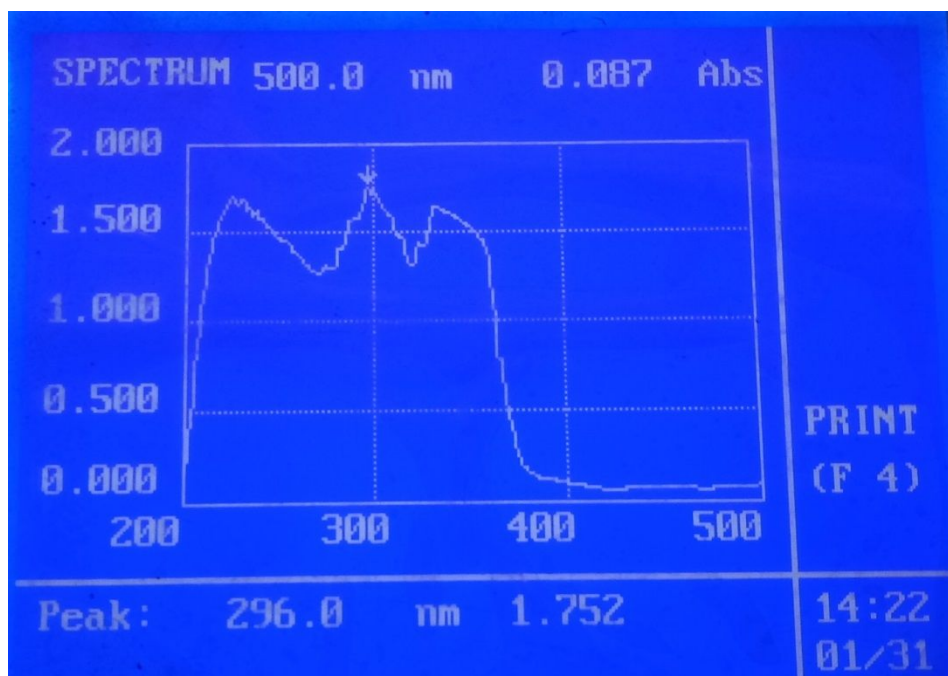

**Figure S6:** UV-Vis spectra of compound 5.

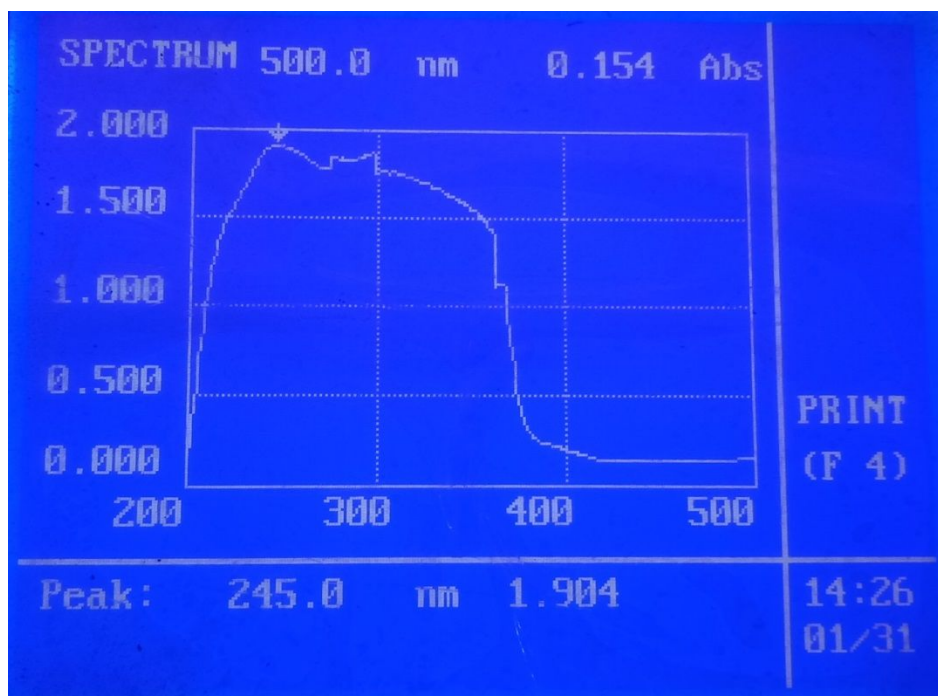

**Figure S7:** UV-Vis spectra of compound 6.

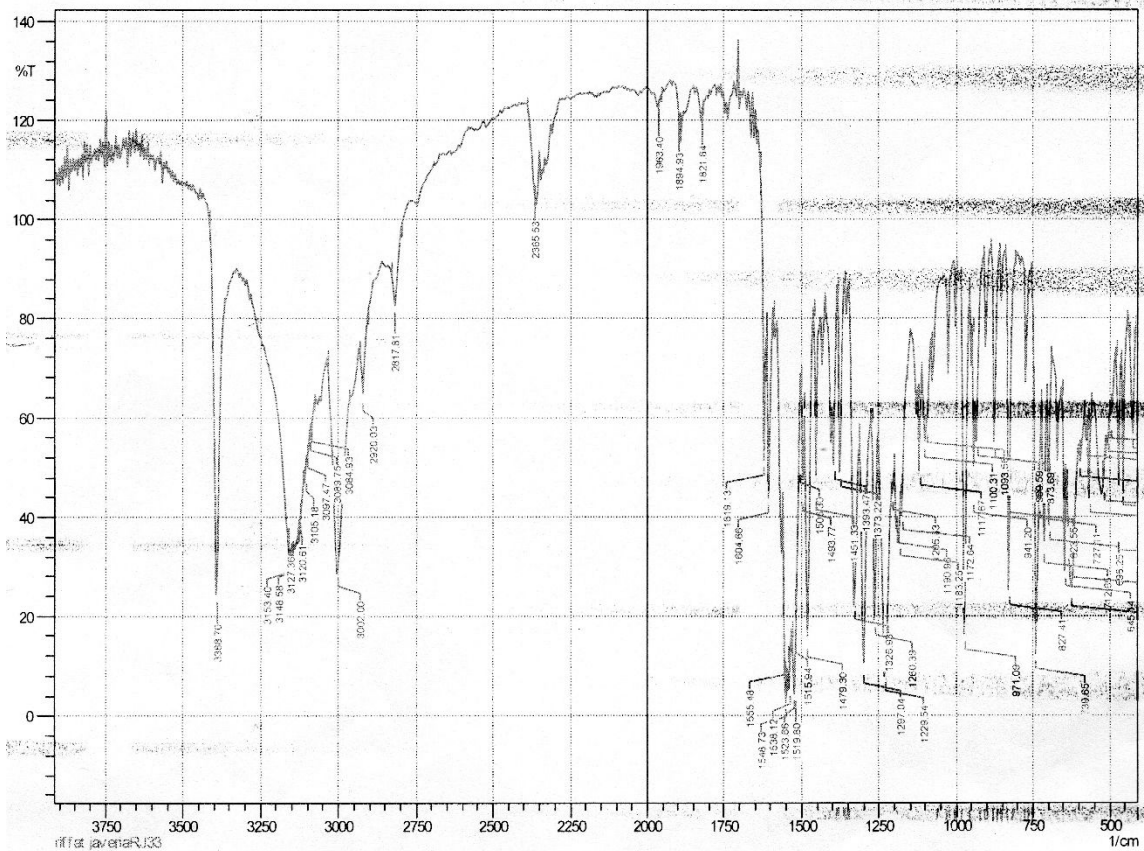

Figure S8: IR Spectra of compound 1



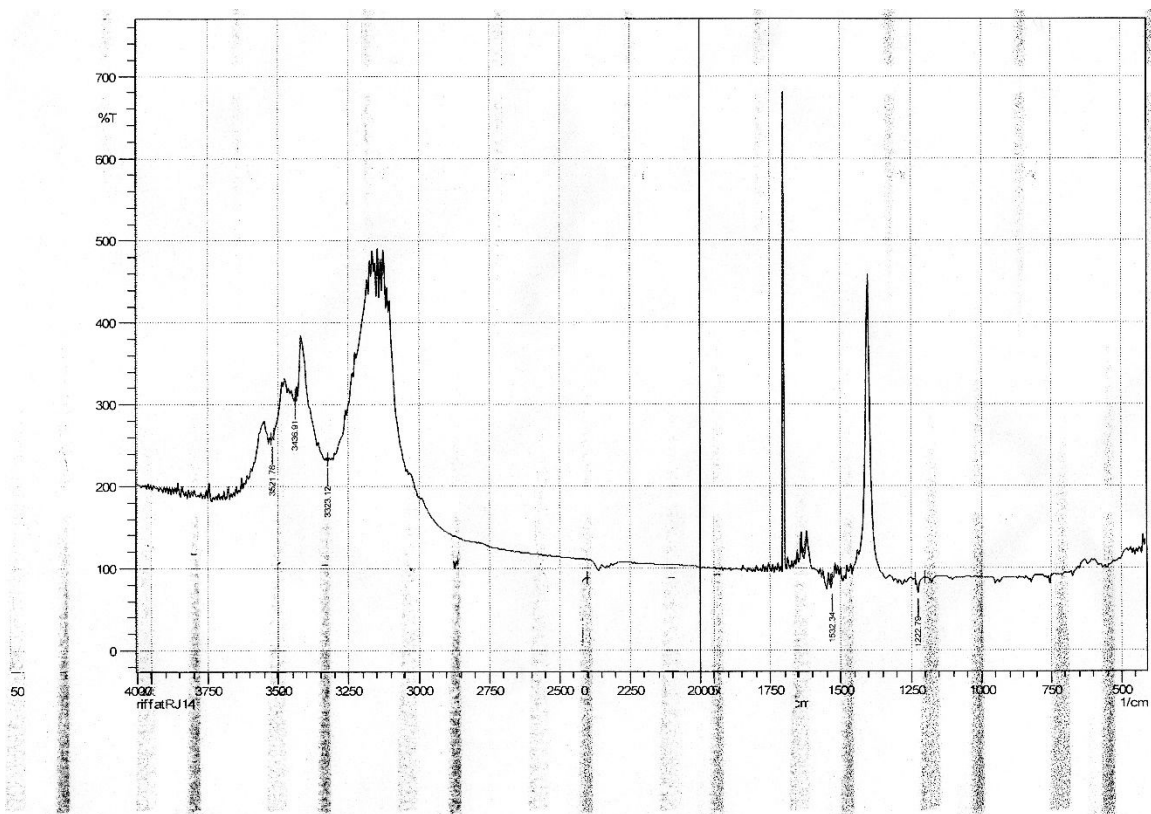

Figure S9: IR Spectra of compound 2

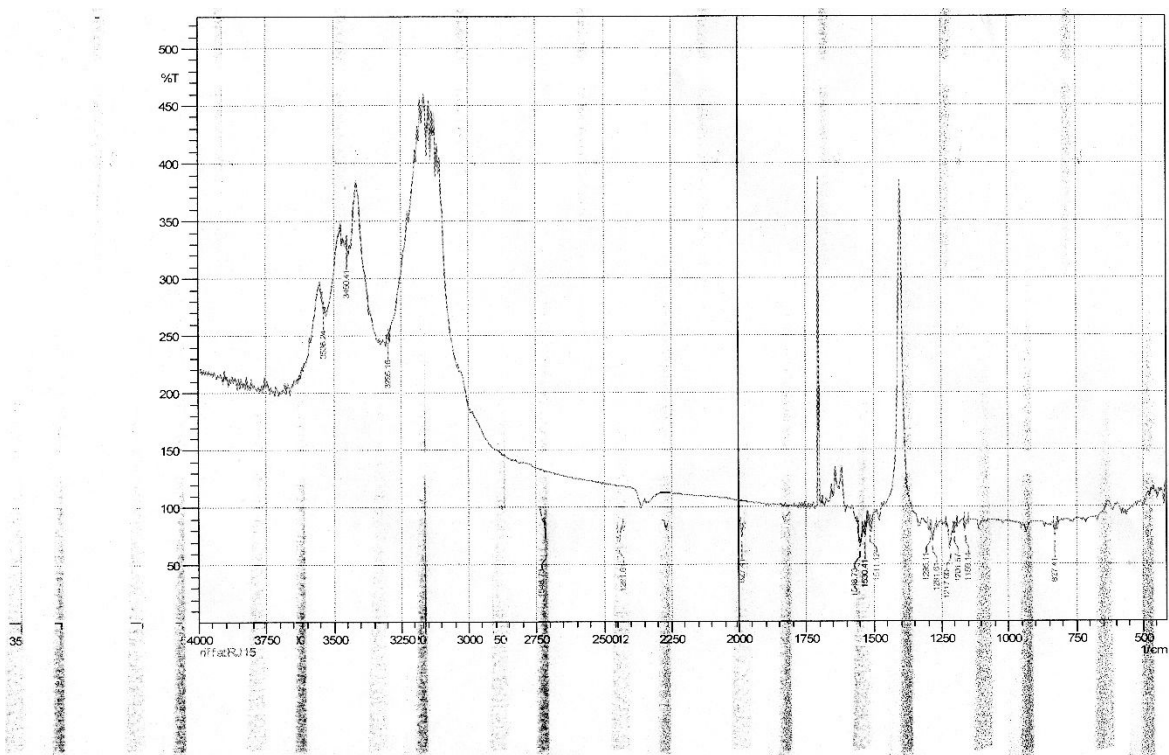

**Figure S10:** IR Spectra of compound 3

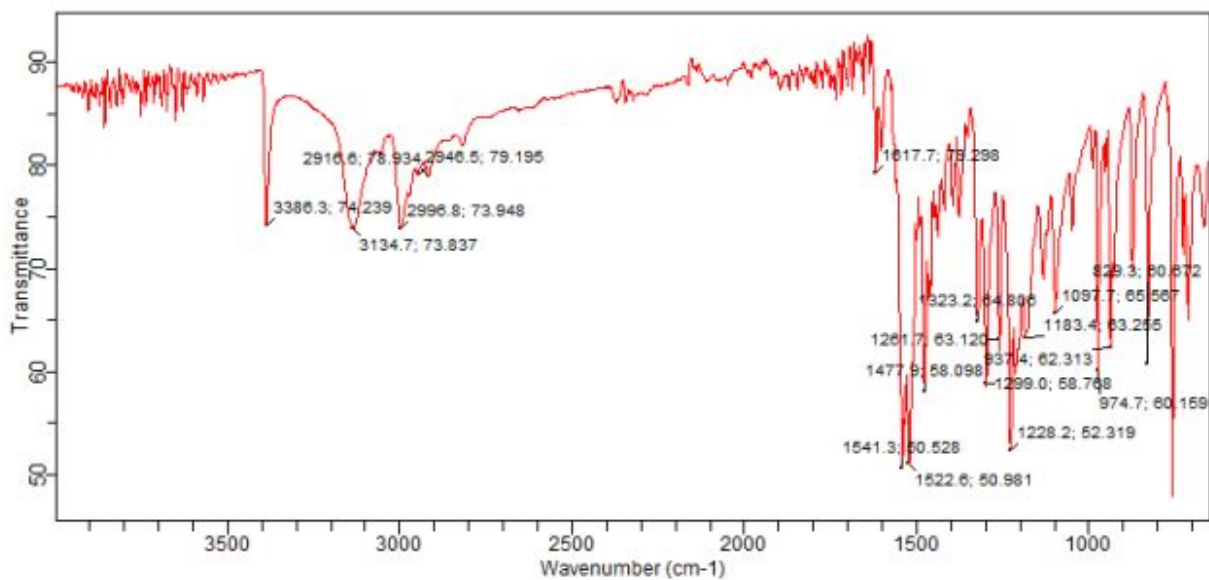

**Figure S11:** IR Spectra of compound 4

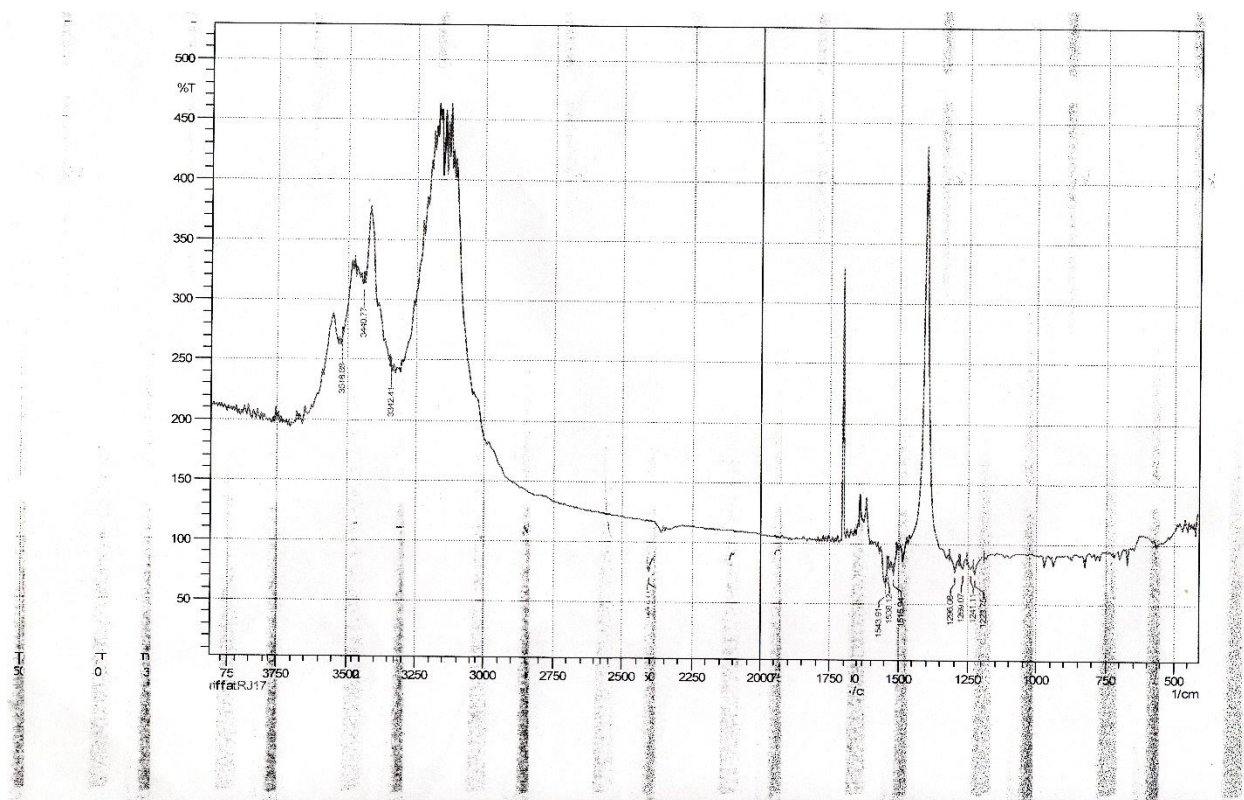

**Figure S12:** IR Spectra of compound 5

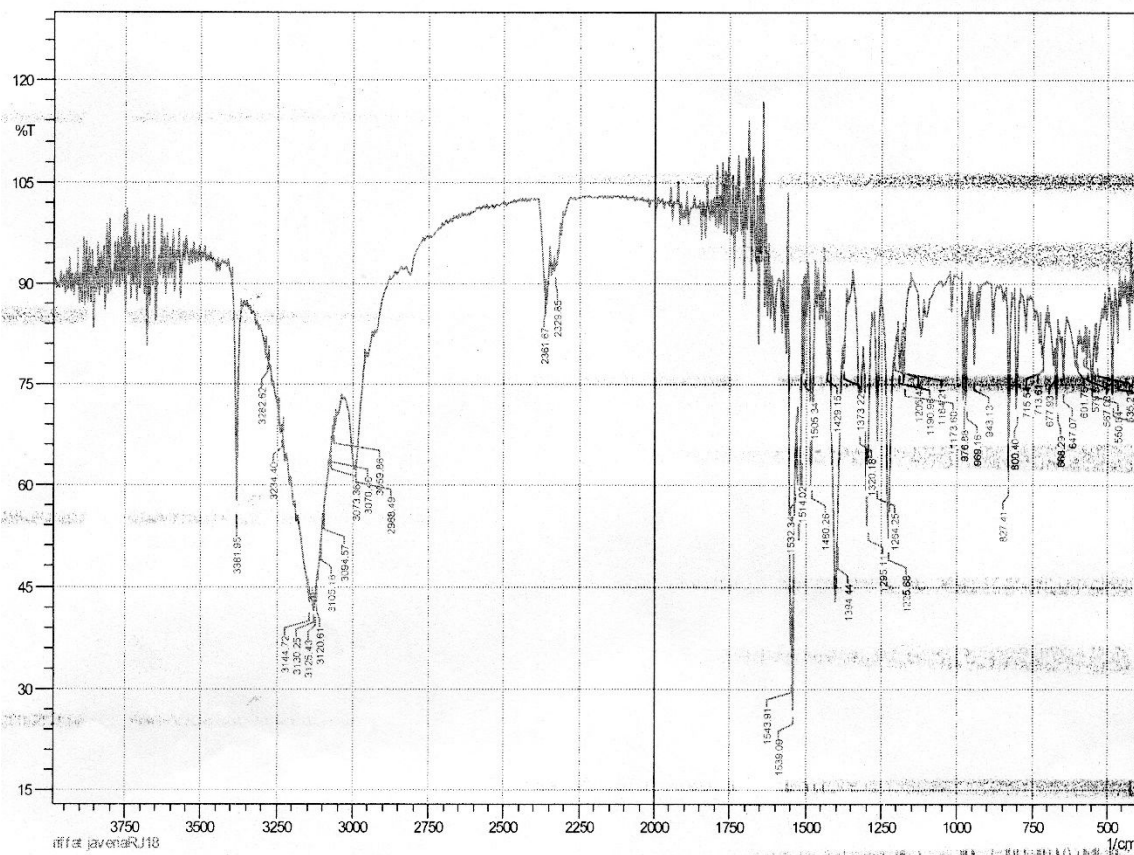

Figure S13: IR Spectra of compound 6



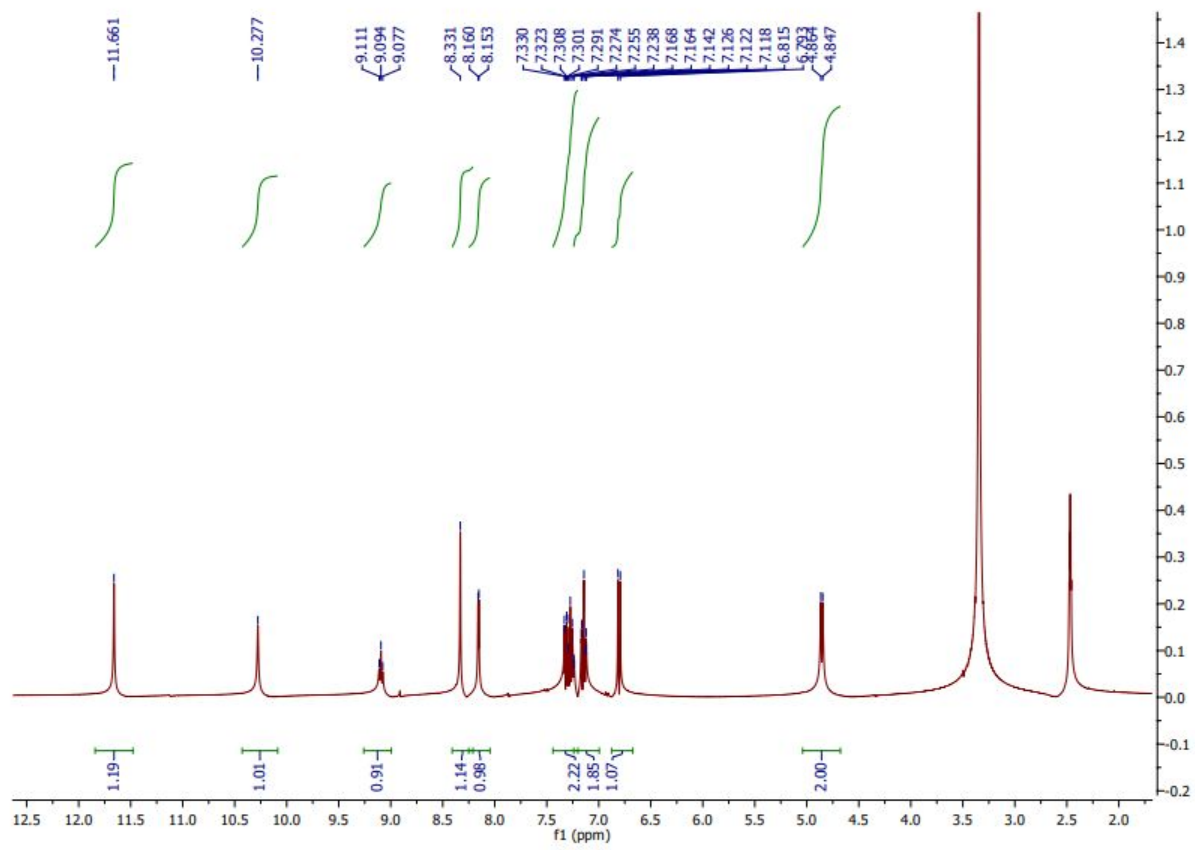

**Figure S14:**  $^1\text{H}$ NMR Spectra of compound 1

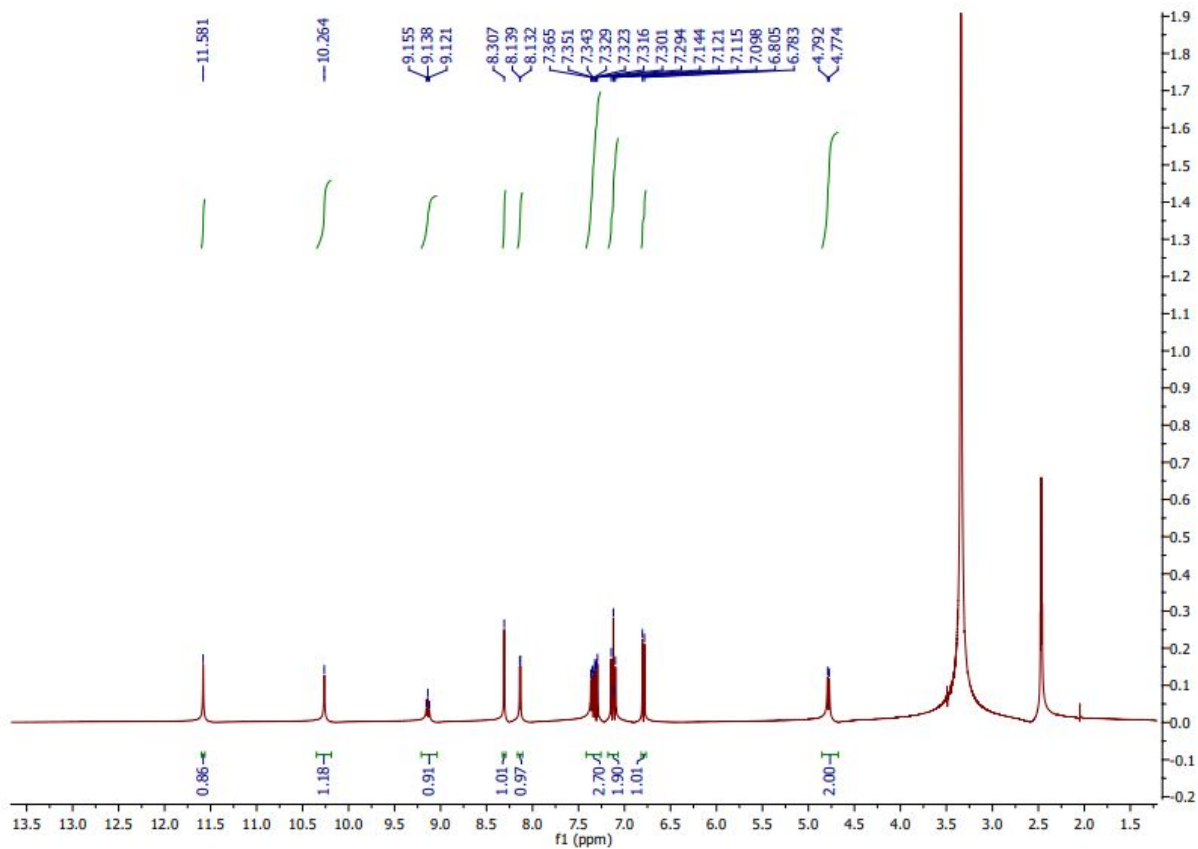

Figure S15: <sup>1</sup>H NMR Spectra of compound 2

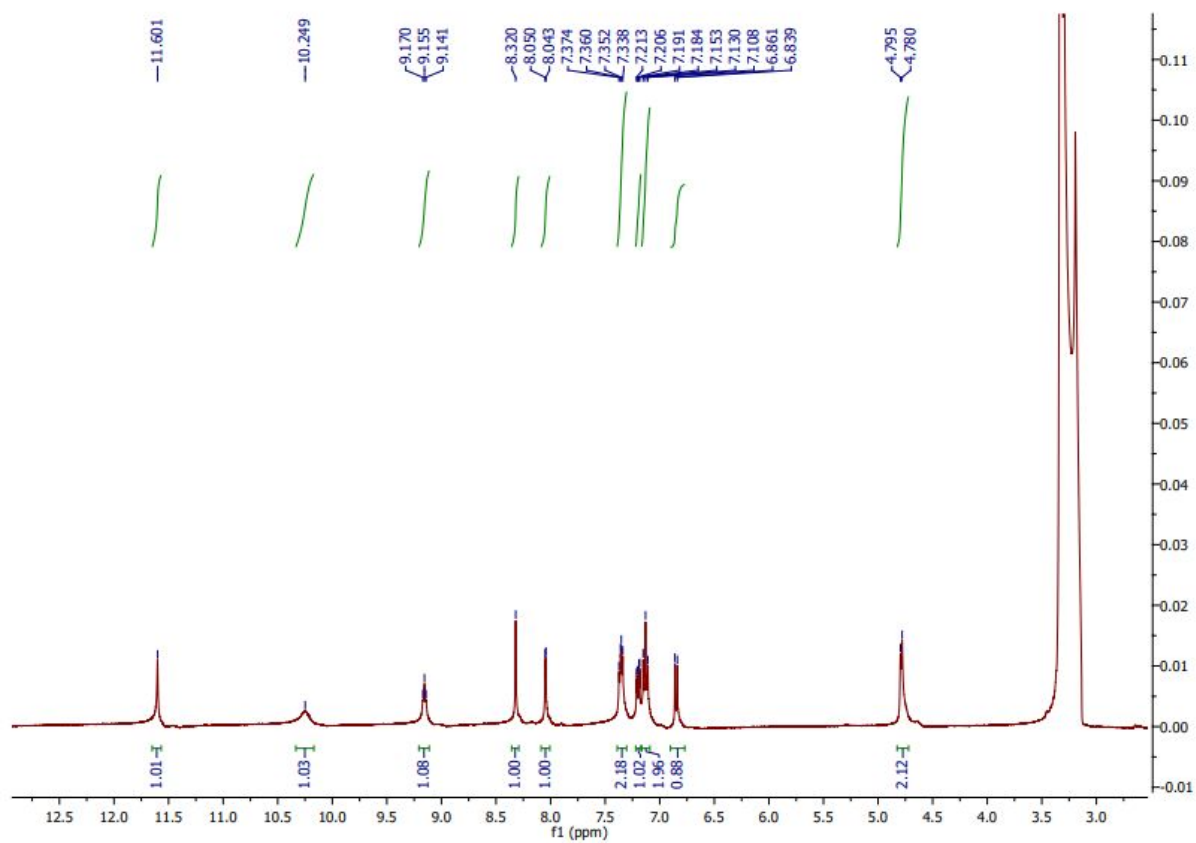

**Figure S16:** <sup>1</sup>H NMR Spectra of compound 3

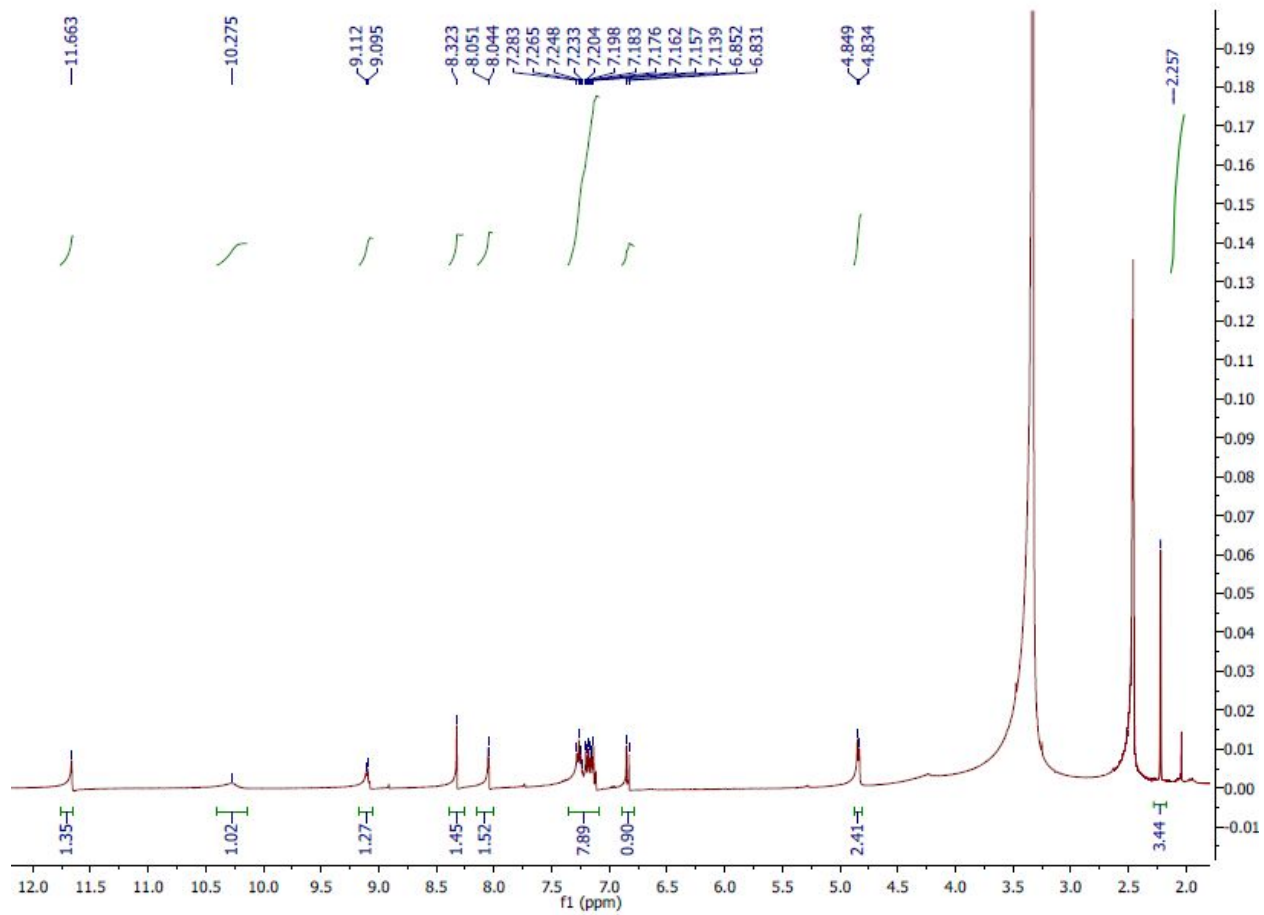

Figure S17:  $^1\text{H}$ NMR Spectra of compound 4

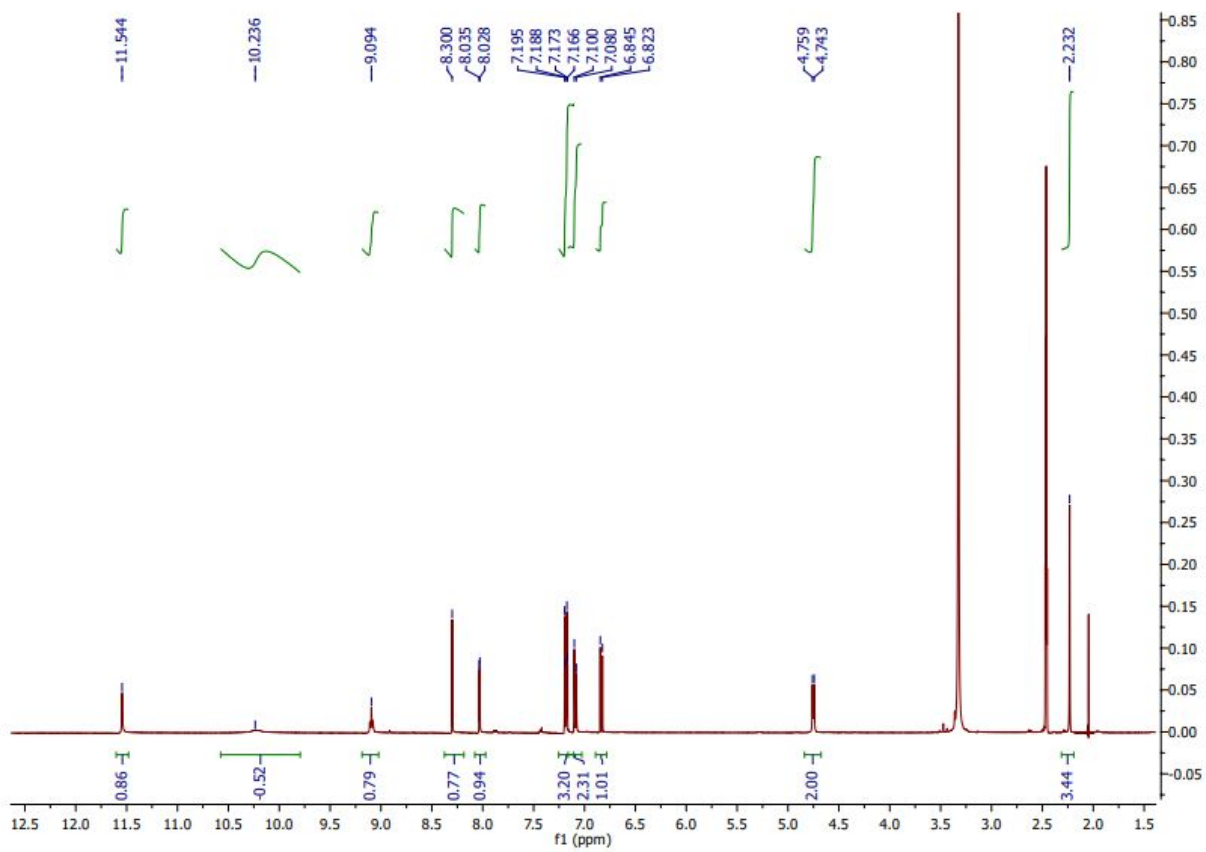

**Figure S18:**  $^1\text{H}$ NMR Spectra of compound 5

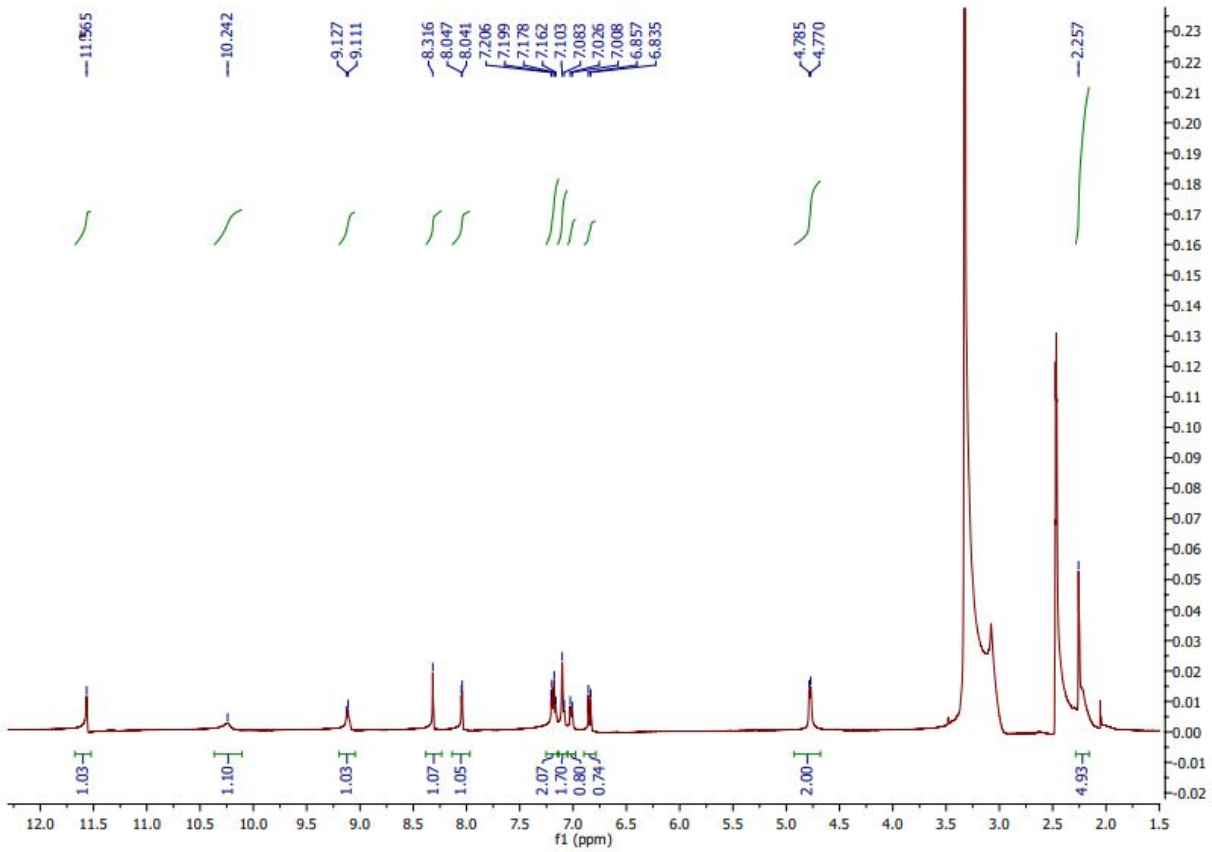

**Figure S19:**  $^1\text{H}$ NMR Spectra of compound 6
